# Supplementary material for: The Effects of Late Cenozoic Climate Change on the Global Distribution of Frost Cracking
Source: Copernicus journal article supplement (doi:10.5194/esurf-2021-78), 2022-01-27
Supplement: Supplementary file 1 [file esurf-2021-78-supplement.zip]

Archive with 5 entries (5 files):
- FCI_ascii.zip
- FCI_netCDF.zip
- FCI_shapefiles.zip
- FCI_tiff.zip
- Supplementary material_frost_cracking_version1.pdf
