# Supplementary material for: The Effects of Late Cenozoic Climate Change on the Global Distribution of Frost Cracking
Source: Copernicus journal article supplement (doi:10.5194/esurf-2021-78), 2022-01-27
Supplement: Supplementary file [file esurf-2021-78-RC1-supplement.pdf]

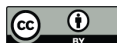

# 1 The Effects of Late Cenozoic Climate Change on the Global 2 Distribution of Frost Cracking

3 Hemanti Sharma<sup>1</sup>, Sebastian G. Mutz<sup>1</sup>, Todd A. Ehlers<sup>1\*</sup>

4 <sup>1</sup>Department of Geosciences, University of Tuebingen, Tuebingen, 72076, Germany

5 \*Correspondence to: Todd A. Ehlers (todd.ehlers@uni-tuebingen.de)

6 **Abstract.** Frost cracking is a dominant mechanical weathering phenomenon facilitating the breakdown of bedrock in  
7 periglacial regions. Despite recent advances in understanding frost cracking processes, few studies have addressed how global  
8 climate change over the Late Cenozoic may have impacted spatial variations in frost cracking intensity. In this study, we  
9 estimate global changes in frost cracking intensity (FCI) by segregation ice growth. Existing process-based models of FCI are  
10 applied in combination with soil thickness data from the Harmonized World Soil Database. Temporal and spatial variations in  
11 FCI are predicted using surface temperatures changes obtained from ECHAM5 general circulation model simulations  
12 conducted for four different paleoclimate time-slices. Time-slices considered include Pre-Industrial (~1850 CE, PI), Mid-  
13 Holocene (~6 ka, MH), Last Glacial Maximum (~21 ka, LGM) and Pliocene (~3 Ma, PLIO) times. Results indicate for all  
14 paleoclimate time slices that frost cracking was most prevalent (relative to PI times) in the mid to high latitude regions, as well  
15 as high-elevation lower latitudes areas such the Himalayas, Tibet, European Alps, the Japanese Alps, the USA Rocky  
16 Mountains, and the Andes Mountains. The smallest deviations in frost cracking (relative to PI conditions) were observed in  
17 the MH simulation, which yielded slightly higher FCI values in most of the areas. In contrast, larger deviations were observed  
18 in the simulations of the colder climate (LGM) and warmer climate (PLIO). Our results indicate that the impact of climate  
19 change on frost cracking was most severe during the PI – LGM period due to higher differences in temperatures and glaciation  
20 at higher latitudes. In contrast, the PLIO results indicate low FCI in the Andes and higher values of FCI in Greenland and  
21 Canada due to the diminished extent of glaciation in the warmer PLIO climate.

22 **Keywords:** Climate Change, frost cracking, physical weathering, Pre-Industrial, Mid-Holocene, Last Glacial Maximum,  
23 Pliocene

## 24 1. Introduction

25 Climate change, mountain building, and erosion are closely linked over different spatial and temporal scales (e.g. Whipple,  
26 2009; Adams et al., 2020). Over long (million year) timescales, mountain building alters global climate by introducing physical  
27 obstacles to atmospheric flow (Raymo and Ruddiman, 1992) that influences regional temperatures and precipitation (Botsyun  
28 et al., 2020; Ehlers and Poulsen, 2009; Mutz et al., 2018; Mutz and Ehlers, 2019). Over decadal to million-year time scales,  
29 climate change impacts the erosion of mountains both indirectly, e.g. through the modification of vegetation cover (e.g. Acosta  
30 et al., 2015; Schmid et al., 2018; Werner et al., 2018; Starke et al., 2020), and directly through its influence on physical and  
31 chemical weathering processes, as well as glacial, fluvial and hillslope erosion (e.g. Valla et al., 2011; Herman et al., 2013;  
32 Lease and Ehlers, 2013; Perron, 2017). Climate change from the Late Cenozoic to present has played an important role in  
33 eroding mountain topography and lowland sedimentation (Hasler et al., 2011; Herman and Champagnac, 2016; Marshall et  
34 al., 2015; Peizhen et al., 2001; Rangwala and Miller, 2012). Climate change influences surface processes through not only  
35 precipitation changes, but also through seasonal temperature changes that affect physical weathering mechanisms, such as  
36 frost cracking (Anderson, 1998; Delunel et al., 2010; Hales and Roering, 2007; Walder and Hallet, 1985). Frost cracking occurs



37 when the pressure of freezing (and expanding) water in pore walls or fractures exceeds the cohesive strength of the porous  
38 media and causes cracks to propagate (Davidson and Nye, 1985). Frost cracking is a dominant mechanism of weathering in  
39 periglacial regions (Marshall et al., 2015), and typically occurs at latitudes greater than 30°N and 30°S. Here, we complement  
40 previous work on the effects of climate on surface processes by addressing the following hypothesis: If Late Cenozoic global  
41 climate change resulted in latitudinal variations in ground surface temperatures, then the intensity of frost cracking should  
42 temporally and spatially vary in such a way that leads to the occurrence of more intense frost cracking at lower latitudes during  
43 colder climates.

44 Previous field studies of frost cracking in mountain regions includes studies in, for example, the Japanese Alps (Matsuoka,  
45 2001), Southern Alps of New Zealand (Hales and Roering, 2009), Swiss Alps (Amitrano et al., 2012; Girard et al., 2013;  
46 Matsuoka, 2008; Messenzehl et al., 2017), French Western Alps (Delunel et al., 2010), Italian Alps (Savi et al., 2015), Eastern  
47 Alps (Rode et al., 2016), Austrian Alps (Kellerer-Pirklbauer, 2017), Oregon (Marshall et al., 2015; Rempel et al., 2016), and  
48 the Rocky Mountains, USA (Anderson, 1998). These studies demonstrated clear relationships between changes in near surface  
49 air temperatures and frost cracking. Various process-based models have also been developed to estimate frost cracking  
50 intensity (FCI) using mean annual air temperatures (MAT) (Andersen et al., 2015; Anderson, 1998; Anderson et al., 2013;  
51 Hales and Roering, 2007; Marshall et al., 2015) and in some cases, with the additional consideration of sediment thickness  
52 variations over bedrock (Andersen et al., 2015). These studies document the importance of time spent in the frost-cracking  
53 window for the frost-cracking intensity (FCI) of a given area. The frost-cracking window is based on the premise that cracking  
54 occurs in response to segregation ice growth in bedrock when subsurface temperatures are between -8 °C and -3 °C (Anderson,  
55 1998; Walder and Hallet, 1985). More complex models consider near surface thermal gradients as a proxy of the frost cracking  
56 intensity for segregation ice growth, as well as the effects of overlying sediment layer thickness on frost cracking (Andersen  
57 et al., 2015).

58 The previous studies provide insight into not only observed regional variations in frost cracking, but also some of the key  
59 processes required for predicting frost cracking intensity. However, despite recognition that Late Cenozoic global climate  
60 change impacts surface processes (e.g., Mutz et al., 2018; Mutz and Ehlers, 2019) and frost-cracking intensity (e.g. Marshall  
61 et al., 2015), to the best of our knowledge, no study has taken full advantage of climate change predictions in conjunction with  
62 a process-based understanding of the spatiotemporal variations in frost cracking on a global scale. This study builds upon  
63 previous work by estimating the global response in FCI to different end-member climate states. We do this by coupling existing  
64 frost-cracking models to high-resolution paleoclimate General Circulation Model (GCM) simulations (Mutz et al., 2018). More  
65 specifically we apply three different frost-cracking models that are driven by predicted surface temperature changes from GCM  
66 time-slice experiments including (a) the Pliocene (~3 Ma, PLIO), considered an analog for Earth's potential future due to  
67 anthropogenic climate change, (b) the Last Glacial Maximum (~21 ka, LGM), covering a full glacial period, (c) the Mid-  
68 Holocene (~6 ka, MH) climate optimum, and (d) Pre-Industrial (~1850 CE, PI) conditions before the onset of significant  
69 anthropogenic disturbances to climate. In addition to a global analysis, we investigate how FCI varies for selected orogens  
70 including the Himalaya-Tibet, Europe and the Andes.

## 71 2. Data

72 This manuscript builds upon paleoclimate model simulations we previously published for different time periods (Mutz et al.,  
73 2018; Mutz and Ehlers, 2019). The output from those simulations was used for new calculations of FCI described below.  
74 More specifically, the climate and soil used for this study includes simulated daily land surface temperatures from different  
75 paleoclimatic time-slice experiments (PI, MH, LGM and PLIO) conducted with the GCM ECHAM5 simulations (Mutz et al.,



76 2018), and soil thickness data (Wieder, 2014). Due to the lack of paleo soil thickness data, global variations in soil thickness  
 77 are assumed to be uniform between all time-slices investigated.

78 The ECHAM5 paleoclimate simulations have a high spatial resolution (T159, corresponding roughly to a 80km x 80km  
 79 horizontal grid at the equator) and 31 vertical levels (to 10hPa). ECHAM5 was developed at the Max Planck Institute for  
 80 Meteorology (Roeckner et al., 2003). It is based on the spectral weather forecast model of ECMWF (Simmons et al., 1989)  
 81 and is a well-established tool in modern and paleoclimate studies. The ECHAM5 paleoclimate simulations by Mutz et al.  
 82 (2018) were driven with time-slice specific boundary conditions derived from multiple modeling initiatives and  
 83 paleogeographic, paleoenvironmental and vegetation reconstruction projects. (see Table 1). Details about the boundary  
 84 conditions and prevailing climates for specific time-slices (PI, MH, LGM and PLIO) are provided in Mutz et al. (2018). Each  
 85 simulated time-slice resulted in 17 simulated model years, where the first two years contained model spin up effects and were  
 86 discarded. The remaining 15 years of simulated climate were in dynamic equilibrium with the prescribed boundary conditions  
 87 and used for our analysis.

88

89 **Table 1. Boundary Conditions of the paleoclimate simulations (Mutz et al., 2018).**

| Paleoclimate Simulations | Boundary Conditions                                                                                                                                                                                                                                                                                                                                                                                                                                                                                                                                                                                                                                                                                                                                                                                 |
|--------------------------|-----------------------------------------------------------------------------------------------------------------------------------------------------------------------------------------------------------------------------------------------------------------------------------------------------------------------------------------------------------------------------------------------------------------------------------------------------------------------------------------------------------------------------------------------------------------------------------------------------------------------------------------------------------------------------------------------------------------------------------------------------------------------------------------------------|
| PI (~ 1850)              | <ul style="list-style-type: none"> <li>• Sea-Surface temperatures (SST) and sea-ice concentrations (SIC) were sourced from transient coupled ocean-atmosphere simulations (Dietrich et al., 2013; Lorenz and Lohmann, 2004)</li> <li>• Green-house gas (GHG) concentrations (Dietrich et al., 2013) were obtained from ice-core-based reconstructions of CO<sub>2</sub> (Etheridge et al., 1996), CH<sub>4</sub> (Etheridge et al., 1998), and N<sub>2</sub>O (Sowers et al., 2003)</li> </ul>                                                                                                                                                                                                                                                                                                      |
| MH (~ 6 ka)              | <ul style="list-style-type: none"> <li>• SST and SIC are derived from a transient, low resolution, coupled atmosphere-ocean simulation of the mid (6 ka) Holocene (Lohmann et al., 2013; Wei and Lohmann, 2012)</li> <li>• GHG concentrations (Dietrich et al., 2013) are obtained from ice-core-based reconstructions of CO<sub>2</sub> (Etheridge et al., 1996), CH<sub>4</sub> (Etheridge et al., 1998), and N<sub>2</sub>O (Sowers et al., 2003)</li> <li>• Global vegetation maps are based on plant functional types maps by the BIOME 6000 / Palaeovegetation Mapping Project (Prentice et al., 2000; Harrison et al., 2001; Bigelow et al., 2003; Pickett et al., 2004) and model predictions by Arnold et al. (2009)</li> <li>• Orbital parameters from Dietrich et al., (2013)</li> </ul> |
| LGM (~ 21 ka)            | <ul style="list-style-type: none"> <li>• Land-sea distribution and ice sheet extent and thickness are based on the PMIP III guidelines (Abe-Ouchi et al., 2015)</li> <li>• SST and SIC are based on GLAMAP (Sarnthein et al, 2003) and CLIMAP (CLIMAP group members, 1981) reconstructions</li> <li>• GHGs concentrations are prescribed following Otto-Bliesner et al. (2006)</li> <li>• Global vegetation maps are based on the plant functional types maps by the BIOME 6000 / Palaeovegetation Mapping Project (Prentice et al., 2000; Harrison et al., 2001; Bigelow et al., 2003; Pickett et al., 2004) and model predictions by Arnold et al. (2009)</li> <li>• Orbital parameters from Dietrich et al., (2013)</li> </ul>                                                                   |
| PLIO (~ 3 Ma)            | <ul style="list-style-type: none"> <li>• Surface conditions (SST, SIC, sea land mask, topography and ice cover), GHG concentrations and orbital parameters are obtained from the PRISM project (Haywood et al., 2010; Sohl et al., 2009; Dowsett et al., 2010)</li> <li>• PRISM vegetation reconstruction converted to ECHAM5 compatible plant functional types following Stepanek and Lohmann (2012)</li> </ul>                                                                                                                                                                                                                                                                                                                                                                                    |

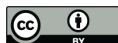

90

91 \* (SST: Sea Surface Temperature; SIC: Sea Ice Concentration; GHG: Greenhouse Gas; PMIP III: Paleoclimate Modelling

92 Intercomparison Project, phase 3; PRISM: Pliocene Research, Interpretation and Synoptic Mapping)

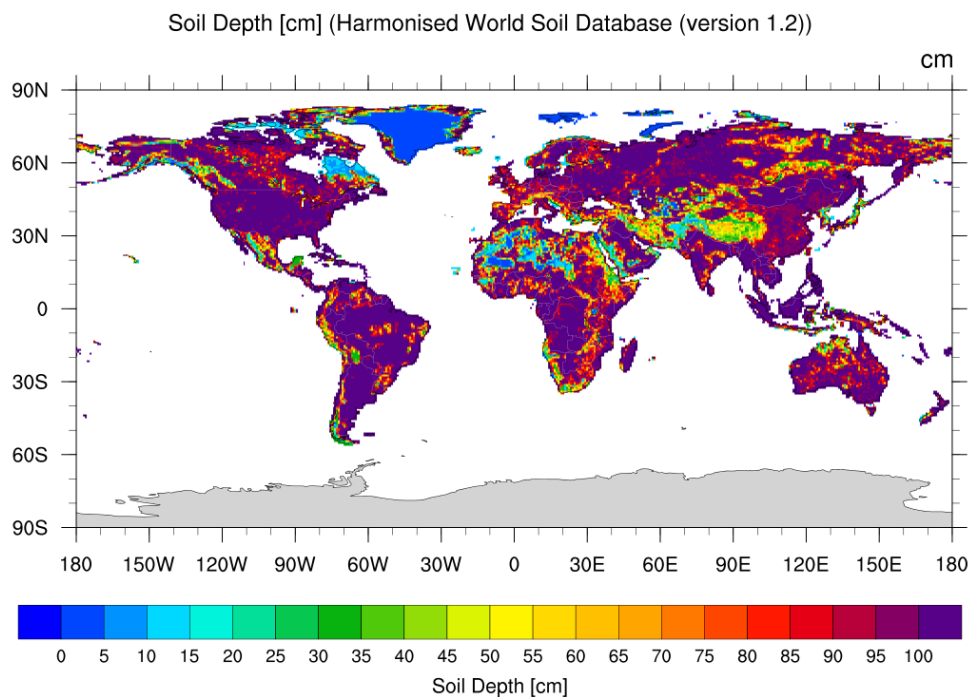

93

94 **Figure 1. Soil depth map from the Harmonized World Soil Database (HWSD, version 1.2) used in this study (Wieder, 2014).**

95 Soil thickness data was obtained from the re-gridded Harmonized World Soil Database (HWSD) v1.2 (Wieder, 2014) which  
96 has a 0.05-degree spatial resolution and depths ranging from 0 m to 1 m (Fig. 1). In the dataset, reference soil depth for all the  
97 soil units is set to 100 cm, except for Rendzinas and Rankers of FAO-74 and Leptosols of FAO-90, where the reference soil  
98 depth is set to 30 cm, and Lithosols of FAO-74 and Lithic Leptosols of FAO-90, where it is set to 10 cm (Wieder, 2014). The  
99 above soil thickness data was upscaled to match the spatial resolution of the ECHAM5 paleoclimate simulations (T159, ca.  
100 80km x 80km).

### 101 3. Methods

#### 102 3.1. Pre-processing of GCM simulation temperature data

103 We calculated the **mean annual land surface temperatures (MAT)** to serve as input for subsequent calculations and a reference  
104 for differences in global paleoclimate. The MAT's for the paleoclimate GCM experiments (PLIO, LGM, MH, and PI) were  
105 calculated (Fig. 2) from each of the simulations' 15 years of daily land surface temperature values. In addition, the half  
106 amplitude of annual surface temperature variations ( $T_a$ ) was extracted at all surface grid locations for all years (Fig. 3). We  
107 use the MAT for ground surface temperature in subsequent calculations, following Anderson et al., (2013), Marshall et al.,



108 (2015), and Rempel et al., (2016)). The maxima and minima for global average MAT's and Ta's for all the time-slices are  
 109 shown in Table 2.

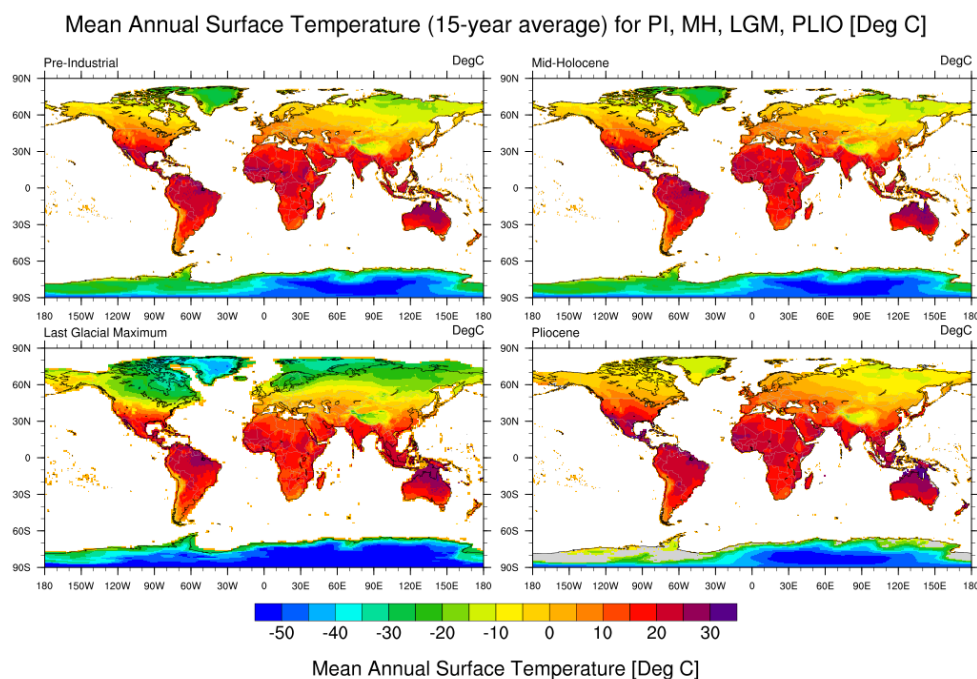

110

111 **Figure 2.** Mean Annual Surface Temperature maps (15-year average) from the ECHAM5 GCM simulations for the Pre-Industrial  
 112 (top-left), Mid-Holocene (top-right), Last Glacial Maximum (bottom-left), and mid-Pliocene (bottom-right) (unit: °C). These are  
 113 calculated from GCM simulation output of Mutz et al. (2018) and Mutz and Ehlers (2019).

114 **Table 2.** MAT and Ta (for ground surface temperature) for Pre-Industrial, Mid-Holocene, Last Glacial Maximum and Pliocene  
 115 simulations.

| Time-slices<br>(Paleoclimate Simulations) | MAT (°C) |         | Ta (°C) |         |
|-------------------------------------------|----------|---------|---------|---------|
|                                           | Minimum  | Maximum | Minimum | Maximum |
| <b>Pre-Industrial (~ 1850)</b>            | -58.31   | 34.03   | 0       | 38.64   |
| <b>Mid-Holocene (~ 6 ka)</b>              | -58.50   | 35.19   | 0       | 39.6    |
| <b>Last Glacial Maximum (~21 ka)</b>      | -66.93   | 38.74   | 0       | 41.74   |
| <b>Pliocene (~ 3 Ma)</b>                  | -56.20   | 48.23   | 0       | 43.21   |

116

117 The calculation of temporally varying sub-surface temperatures follows the approach of Hales and Roering (2007) and uses  
 118 the analytical solution for the one-dimensional heat conduction equation (Turcotte and Schubert, 2014) forced with daily  
 119 temperatures following sinusoidal variations. Temperature variations with depth and time can were calculated at each GCM  
 120 grid point as:

121 
$$T(z, t) = MAT + Ta \cdot e^{-z \sqrt{\frac{\pi}{\alpha P_y}}} \cdot \sin\left(\frac{2\pi t}{P_y} - z \sqrt{\frac{\pi}{\alpha P_y}}\right) \quad (1)$$



122 where,  $T$  represents daily subsurface temperature at depth  $z$  (m) and time  $t$  (days in a year),  $MAT$  and  $Ta$  represent mean annual  
123 surface temperature and half amplitude of annual temperature variation respectively,  $P_y$  is the period of the sinusoidal cycle (1  
124 year), and  $\alpha$  is the thermal diffusivity. Thermal diffusivity values near the Earth's surface can range from  $1 - 2 \times 10^{-6} m^2 s^{-1}$   
125 for most rocks (Anderson, 1998) and range between  $7 - 10 \times 10^{-7} m^2 s^{-1}$  for other Earth materials comprising the overlying  
126 sediment layer (Eppelbaum et al., 2014). In this study, we used a thermal diffusivity of  $1.5 \times 10^{-6} m^2 s^{-1}$  for bedrock and  $8 \times$   
127  $10^{-7} m^2 s^{-1}$  for the overlying sediment layer. The maximum depth investigated here is 20 m, as it is slightly deeper than the  
128 maximum frost penetration depth of  $\sim 14$  m reported by (Hales and Roering, 2007).

Half Amplitude of Annual Temperature Variation (15-year average) for MH, LGM, PLIO [Deg C]

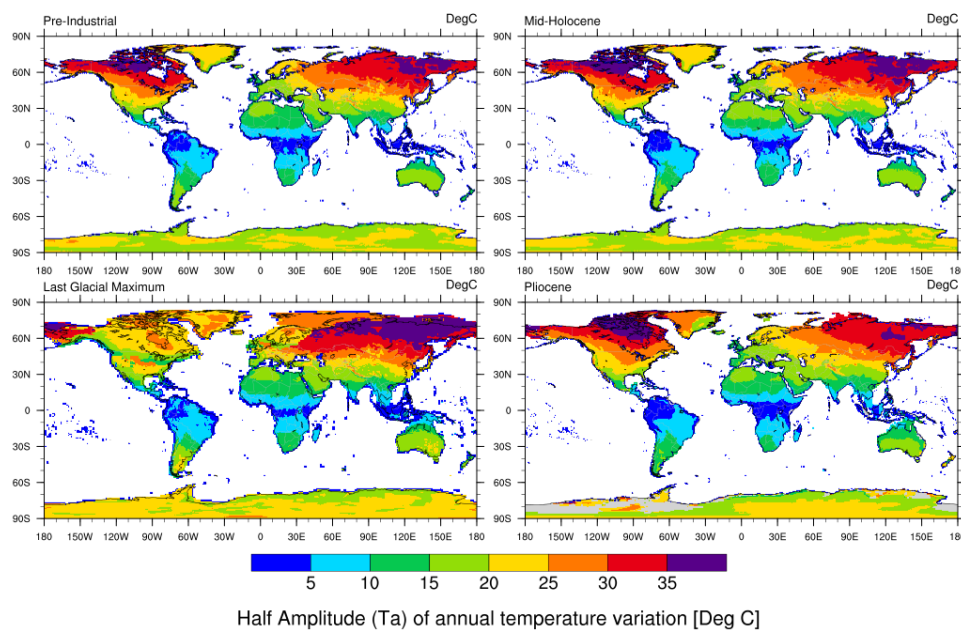

129

130 **Figure 3. Half Amplitude of Annual Temperature Variation (15-year average) for the Pre-Industrial (top-left), Mid-Holocene (top-**  
131 **right), Last Glacial Maximum (bottom-left), and Pliocene (bottom-right) (unit: °C). These are calculated from GCM simulation**  
132 **output of Mutz et al., (2018) and Mutz and Ehlers (2019).**

133 The calculation of subsurface temperatures was discretized into 200 depth intervals from the surface to the maximum depth of  
134 20 m. Smaller depth intervals ( $\sim 1$  cm) were used near the surface and large intervals ( $\sim 20$  cm) at greater depths, because the  
135 FCI is expected to change most dramatically near the surface and dampen with depth due to thermal diffusion (Andersen et  
136 al., 2015).

### 137 3.2. Estimation of Frost Cracking Intensity

138 We applied three different approaches (models) with different levels of complexity to estimate global variations in frost  
139 cracking during different past climates (Fig 4; Andersen et al., 2015; Anderson, 1998; Hales and Roering, 2007). The models  
140 use predicted ground surface temperatures from each grid cell in the GCM to calculate subsurface temperatures and FCI. We  
141 then calculate differences between the FCI from the PI reference simulation and the FCI predicted for the PLIO, LGM and  
142 MH time-slices to assess relative change in FCI over the Late Cenozoic. The conceptual diagram (Fig. 4) illustrates differences





143 in the models used in our study, which are discussed in detail in sections 3.2.1 - 3.2.3. Models 1-3 successively increase in  
 144 complexity and consider more factors. The approach of Andersen et al., (2015), referred to here as Model 3, is the most recent  
 145 and complete in its consideration of the processes (e.g. effect of soil-cover on FCI) that are relevant for frost cracking. Given  
 146 this, we focus our presentation of results in the main text here on Model 3, but for completeness describe below differences of  
 147 Model 3 from earlier Models (1-2). For brevity, results from the earlier models are presented in the supplementary material. A  
 148 flowchart illustrating our methods is presented in Fig. 5. Similar to previous studies, the hydrogeological properties of the  
 149 bedrock (i.e. infiltration, water saturation, porosity and permeability) are ignored in this study. This approach provides a  
 150 simplified means for estimating the FCI for underlying bedrock at a global scale.  
 151

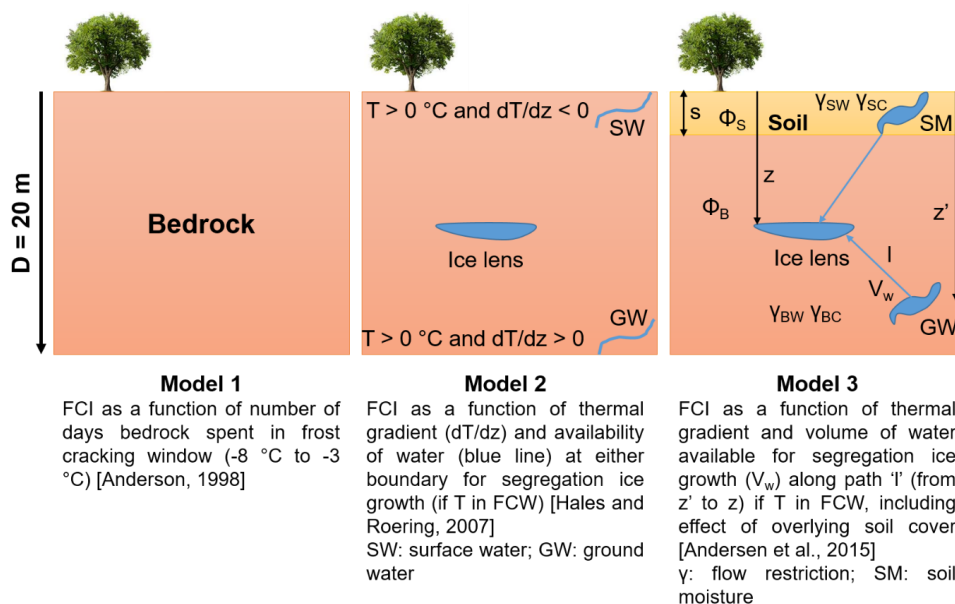

152  
 153 **Figure 4. Conceptual diagram of the models (1, 2, and 3) used for estimating FCI (T: temperature;  $dT/dz$ : thermal gradient; SW:**  
 154 **surface water; GW: groundwater; SM: soil moisture; s: sediment thickness;  $\phi_S$ : soil porosity (0.02);  $\phi_B$ : bedrock porosity (0.3)).**

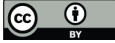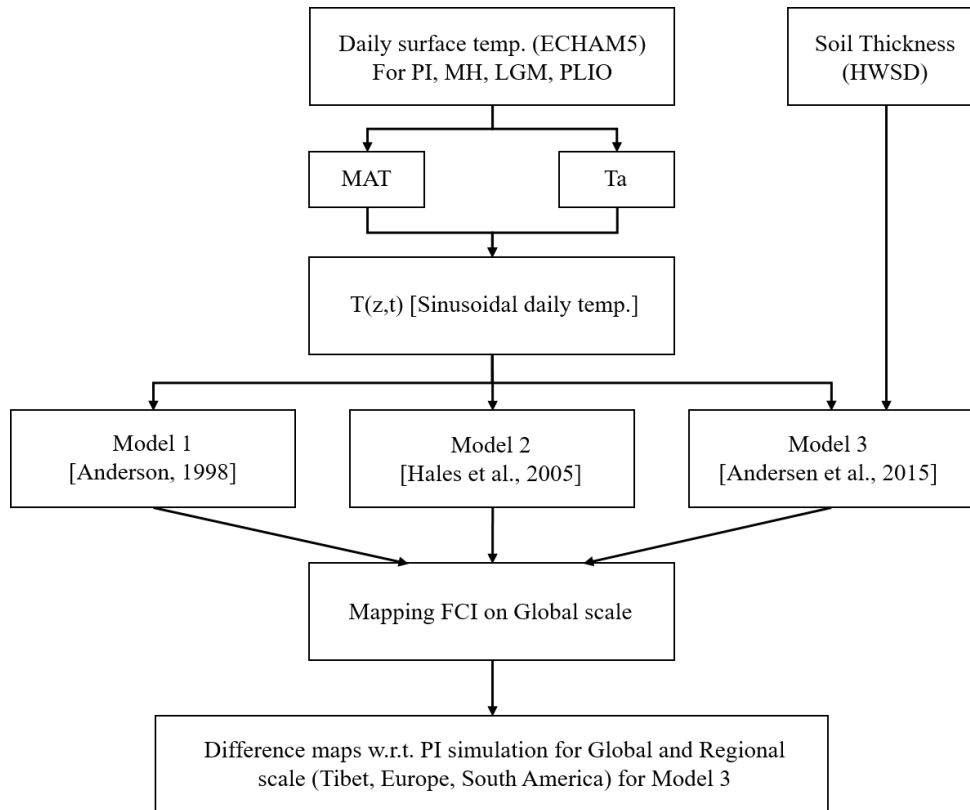

155

156 **Figure 5.** Flowchart describing the methods used in the study based on daily surface temperature simulated by the ECHAM GCM.  
 157 and soil thickness data from HWSD v1.2. Abbreviations include: MAT - mean annual temperature; Ta - half amplitude of annual  
 158 temperature variation; T (z, t) - subsurface temperature at depth z and time t; FCI - frost cracking intensity.

159 **3.2.1. Model 1: Frost cracking intensity as a function of time spent in the frost cracking window (FCW)**

160 Model 1 represents the simplest approach and applies the method of Anderson (1998). In our application of this model we use  
 161 a more representative thermal diffusivity value for rocks of  $1.5 \times 10^{-7} m^2 s^{-1}$ , because the previous study was specific to  
 162 granitic bedrock and applied a diffusivity specific to that. Furthermore, the boundary conditions of a low rock surface albedo  
 163 ( $\leq 0.1$ ) and presence of a high atmospheric transmissivity ( $\geq 0.9$ ) on the surface were relaxed, as surface temperatures were  
 164 used in our study instead of near-surface air temperatures.

165 For our implementation of model 1, we applied equation 1 for sinusoidal varying daily temperatures at the surface, and  
 166 calculated temperatures up to 20 m depth. The number of days spent in the frost cracking window ( $-8^\circ C$  to  $-3^\circ C$ ) for each  
 167 depth interval were calculated over a period of 1 year for all time slices (PI, MH, LGM and PLIO):

$$168 \quad FCI(z) = \begin{cases} N(z), & \text{if } -8^\circ C < T(z, t) - 3^\circ C \\ 0, & \text{else} \end{cases} \quad (2)$$

169 where  $FCI(z)$  is referred to the frost cracking intensity at depth z.  $N(z)$  indicates the number of days the bedrock (at depth z)  
 170 spends in the frost cracking window over a period of 1 year.

171 Estimation of frost cracking intensity for each location included depth averaging of the FCI such that:





$$172 \quad \overline{FCI} = \frac{1}{D} \int_0^D FCI(z) dz \quad (3)$$

173 where  $\overline{FCI}$  is the integrated frost cracking intensity to a depth of  $D = 20$  m. The unit of integrated frost cracking intensity in  
174 this model is *Days*. The FCI values are calculated for all model years separately and then averaged over the total time (15  
175 years) for each paleoclimate time-slice.

### 176 3.2.2. Model 2: Frost cracking intensity as a function of subsurface thermal gradients

177 Model 2 applies the approach of Hales and Roering (2007) to estimate FCI using climate change driven variations in subsurface  
178 thermal gradients. This approach extends the work of Anderson (1998) with the additional consideration of segregation ice  
179 growth. Segregated ice growth is attributed to the migration of liquid water to colder regions in shallow bedrock, accumulating  
180 in localized zones to form ice lenses inducing weathering (Walder and Hallet, 1985).

181 For this approach, we applied equation 1 for temperatures to 20 m depth and for a time duration of 1 year. Again, FCI is  
182 computed for each of the 15 years in the GCM simulation and averaged. To facilitate ice segregation growth, the model  
183 assumes the availability of liquid water ( $T > 0$  °C) at either boundary ( $z = 0$  m or  $z = 20$  m), with a negative thermal gradient  
184 for a positive surface temperature, and a positive thermal gradient for the positive lower boundary ( $z = 20$  m) temperature.  
185 This implementation supports frost cracking in the bedrock with temperatures between  $-8$  °C and  $-3$  °C (Hallet et al., 1991).  
186 In the case of permafrost areas, MAT is always negative, but as sinusoidal  $T(z, t)$  is calculated based on MAT and  $T_a$ , a positive  
187  $T (> 0$  °C) may occur during warmer days of the year. In addition,  $T_a$  is higher for higher latitudes (Fig. 2), which are more  
188 prone to frost cracking.

189 The model is described as follows:

$$190 \quad FCI(z, t) = \begin{cases} \left| \frac{dT}{dz} \right| (z, t), & \text{if } -8^\circ\text{C} < T(z, t) - 3^\circ\text{C} \\ 0, & \text{else} \end{cases} \quad (4)$$

$$191 \quad \overline{FCI} = \int_0^D \int_0^{Py} FCI(z, t) dt dz \quad (5)$$

192 where  $FCI(z, t)$  is the frost cracking intensity at depth  $z$  and time  $t$ . It is an index for the absolute value of the thermal gradient  
193 at that particular depth and time that fulfils the conditions defined above.

194 In equation 5,  $\overline{FCI}$  represents the integrated FCI for a geographic location. More specifically, the FCI is integrated over one  
195 year at each depth and then integrated for all depth elements.  $D$  represents depth (20 m),  $Py$  is a period of the sinusoid (1 year),  
196  $dt$  is the time interval (1 day) and  $dz$  is the depth interval, as described in section 3.1. The unit of integrated frost cracking  
197 intensity in this case is °C. It is calculated for each of the GCM model years and then averaged over the total time (15 years).

### 198 3.2.3. Model 3: Frost cracking intensity as a function of thermal gradients and sediment thickness

199 In the final (most complex) approach used in this study, the effect of an overlying soil layer (Fig. 1) is considered in addition  
200 to the subsurface thermal gradient variations with depth. This model applies the approach of Andersen et al. (2015), which  
201 extends the work of Hales and Roering (2007) and Anderson et al. (2013). The model assumptions are similar to the previous  
202 approaches. For segregation ice growth, it additionally takes into account the influence of the volume of water available in the  
203 proximity of the ice lens. The parameters used in Model 3 are listed below (Table 3).



204

**Table 3. Input parameters for Model 3 (Andersen et al., 2015)**

| Symbol        | Description                      | Value               |
|---------------|----------------------------------|---------------------|
| $\Phi_S$      | Porosity of soil                 | 0.3                 |
| $\Phi_B$      | Porosity of bedrock              | 0.02                |
| $\gamma_{sw}$ | Flow restriction in warm soil    | 1.0 m <sup>-1</sup> |
| $\gamma_{sc}$ | Flow restriction in cold soil    | 2.0 m <sup>-1</sup> |
| $\gamma_{bw}$ | Flow restriction in warm bedrock | 2.0 m <sup>-1</sup> |
| $\gamma_{bc}$ | Flow restriction in cold bedrock | 4.0 m <sup>-1</sup> |
| $V_{cw}$      | Critical water volume            | 0.04 m              |

205

206 In Model 3, frost cracking intensity is estimated as a product of the thermal gradient and volume of water available ( $V_w$ ) for  
 207 segregation ice growth at each depth element, such that:

$$208 \quad FCI(z, t) = \begin{cases} \left| \frac{dT}{dz}(z, t) \right| V_w(z), & \text{if } -8^\circ\text{C} < T(z, t) - 3^\circ\text{C} \\ 0, & \text{else} \end{cases} \quad (6)$$

209 where,  $FCI(z, t)$  is the frost cracking intensity in bedrock at depth  $z$  and time  $t$ , and  $V_w(z)$  is the volume of water available for  
 210 segregation ice growth.  $V_w(z)$  is estimated at each depth ( $z$ ) by integrating the occurrence of unfrozen water along a path  $l$ ,  
 211 starting at depth  $z$  and following a positive thermal gradient towards the ice lens. The volume of available water ( $V_w(z)$ ) and  
 212 total flow restriction ( $\Gamma(z')$ ), between the depth of occurrence of water ( $z'$ ) and the location of segregation ice growth ( $z$ ), are  
 213 calculated using equations 7 and 8 respectively (Andersen et al., 2015):

$$214 \quad V_w(z) = \int_l \phi(z') w_f(z') e^{-\Gamma(z')} dz' \quad (7)$$

$$215 \quad \Gamma(z') = \int_z^{z'} \gamma(z'') dz'' \quad (8)$$

216 where,  $l$  is the distance from depth  $z$  to the surface, lower boundary, or an interface where the thermal gradient changes signs  
 217 (from positive to negative or vice versa). The penalty function  $e^{-\Gamma(z')}$  (Anderson et al., 2013) is a function of the total flow  
 218 restriction ( $\Gamma(z')$ ) at the depth  $z'$ . Since segregation ice growth is exhibited at sub-zero temperatures (below  $-3^\circ\text{C}$ ) and liquid  
 219 water is available at positive temperatures ( $T > 0^\circ\text{C}$ ), water must migrate through a mixture of frozen and unfrozen soil or the  
 220 bedrock. The variables  $\gamma_{sw}$ ,  $\gamma_{sc}$ ,  $\gamma_{bw}$ ,  $\gamma_{bc}$  (defined in Table 3) represent the flow restriction parameters and were used in the  
 221 model to approximate a range of permeabilities (Andersen et al., 2015), but do not explicitly simulate water transport.  
 222 The soil porosity ( $\phi_S = 0.3$ ) is assumed to be higher than that of bedrock ( $\phi_B = 0.02$ ).  $V_w(z)$  is expected to be high due to the  
 223 presence of unfrozen soil in the proximity of a frozen bedrock. Since Model 3 limits the positive effects of  $V_w$  to a critical  
 224 water volume  $V_{cw}$  (Table. 2, i.e., if  $V_w > V_{cw}$ , then  $V_w = V_{cw}$ ), the expected high ( $> V_{cw}$ ) values for  $V_w$  will not affect frost  
 225 cracking any further.

226 Lastly, the integrated frost cracking intensity  $\hat{FCI}$  across Earth's terrestrial surface was calculated by depth integration of the  
 227 FCI averaged over a period of 1 year (Anderson et al., 2013):

$$228 \quad \hat{FCI} = \frac{1}{Py} \int_0^{Py} \int_0^D FCI(z, t) dz dt \quad (9)$$

229 where,  $Py$  is 1 year and  $D$  is the maximum depth investigated (20 m). The unit of integrated FCI in this model is  $^\circ\text{Cm}$ . Integrated  
 230 FCI is calculated for each of the GCM simulation's model years and then averaged over the total number of years (15 years).

231



232 **3.3. Calculation of permafrost extent**

233 The permafrost extent in the LGM and present-day simulations were estimated using the approach of Levvasseur et al. (2011),  
234 where permafrost is assumed to be solely dependent on near surface temperatures, except in high mountainous regions with  
235 varied soil types and snow cover. The boundary conditions were adopted from (Renssen and Vandenberghe, 2003), which  
236 state that continuous permafrost exists in regions with mean annual near surface temperatures of  $-8\text{ }^{\circ}\text{C}$  or below, and coldest  
237 month temperatures of  $-20\text{ }^{\circ}\text{C}$  or lower. Furthermore, we also consider the same study's statement that discontinuous  
238 permafrost exists in the regions with MAT in the range between  $-8\text{ }^{\circ}\text{C}$  and  $-4\text{ }^{\circ}\text{C}$ .

239 **4. Results**

240 In the following, we document the general trends in the estimated FCI from Model 3 (Andersen et al., 2015) in all the  
241 paleoclimate time-slices (PI, MH, LGM, PLIO) based on the coupling of the above models to GCM output for these time  
242 slices. Since spatial and temporal variations in frost cracking do not vary much between the three approaches, for brevity we  
243 focus our presentation of results on the most recent (Model 3 - Andersen et al., 2015) approach, and present the results of the  
244 other two approaches (Model 1, 2; Anderson 1998 and Hales and Roering, 2007) in the supplementary material.

245 **4.1. Model 3: FCI as a function of thermal gradient and soil thickness**

246 For all paleoclimate time slice experiments, the FCI predicted by Model 3 is in the range of  $0 - 0.4\text{ }^{\circ}\text{C m}$  at higher latitudes  
247 ( $30\text{ }^{\circ}\text{N} - 80\text{ }^{\circ}\text{N}$  and  $20\text{ }^{\circ}\text{S} - 80\text{ }^{\circ}\text{S}$ ) (Fig. 6). The maximum FCI values are observed in the higher latitudes ( $50\text{ }^{\circ}\text{N} - 80\text{ }^{\circ}\text{N}$ ) and  
248 show the same pattern as variations in  $T_a$  when  $T_a$  exceeds  $30\text{ }^{\circ}\text{C}$ .

249 In the PI and MH simulations, the highest FCI is observed in North America ( $40\text{ }^{\circ}\text{N} - 55\text{ }^{\circ}\text{N}$  and  $70\text{ }^{\circ}\text{N} - 80\text{ }^{\circ}\text{N}$ ) and Eurasia ( $35$   
250  $^{\circ}\text{N} - 50\text{ }^{\circ}\text{N}$ ,  $55\text{ }^{\circ}\text{E} - 80\text{ }^{\circ}\text{E}$  and  $55\text{ }^{\circ}\text{N} - 80\text{ }^{\circ}\text{N}$ ,  $80\text{ }^{\circ}\text{E} - 180\text{ }^{\circ}\text{E}$ ), with values ranging from  $0.08\text{ }^{\circ}\text{C m}$  to  $0.2\text{ }^{\circ}\text{C m}$ . Low FCI can  
251 be observed in South America, with values between  $0.02\text{ }^{\circ}\text{C m}$  and  $0.05\text{ }^{\circ}\text{C m}$ . This is consistent with results from models 1  
252 and 2 (see supplement).

253 In the LGM simulation, the highest FCI values are observed in Alaska, Turkmenistan, Uzbekistan, Eastern China and north-  
254 eastern latitudes in Eurasia ( $70\text{ }^{\circ}\text{N} - 80\text{ }^{\circ}\text{N}$ ,  $105\text{ }^{\circ}\text{E} - 180\text{ }^{\circ}\text{E}$ ) with values ranging from  $0.08\text{ }^{\circ}\text{C m}$  to  $0.22\text{ }^{\circ}\text{C m}$ . In the Andes  
255 of South America, the frost cracking activity is restricted to the geographical range of  $12\text{ }^{\circ}\text{S} - 55\text{ }^{\circ}\text{S}$ . The highest South  
256 American FCI values ( $\sim 0.15\text{ }^{\circ}\text{C m}$  to  $\sim 0.22\text{ }^{\circ}\text{C m}$ ) are predicted for the southern part of the continent ( $40\text{ }^{\circ}\text{S} - 50\text{ }^{\circ}\text{S}$ ). New  
257 Zealand and the western periphery of Antarctica exhibit some frost cracking activity in the LGM driven models.

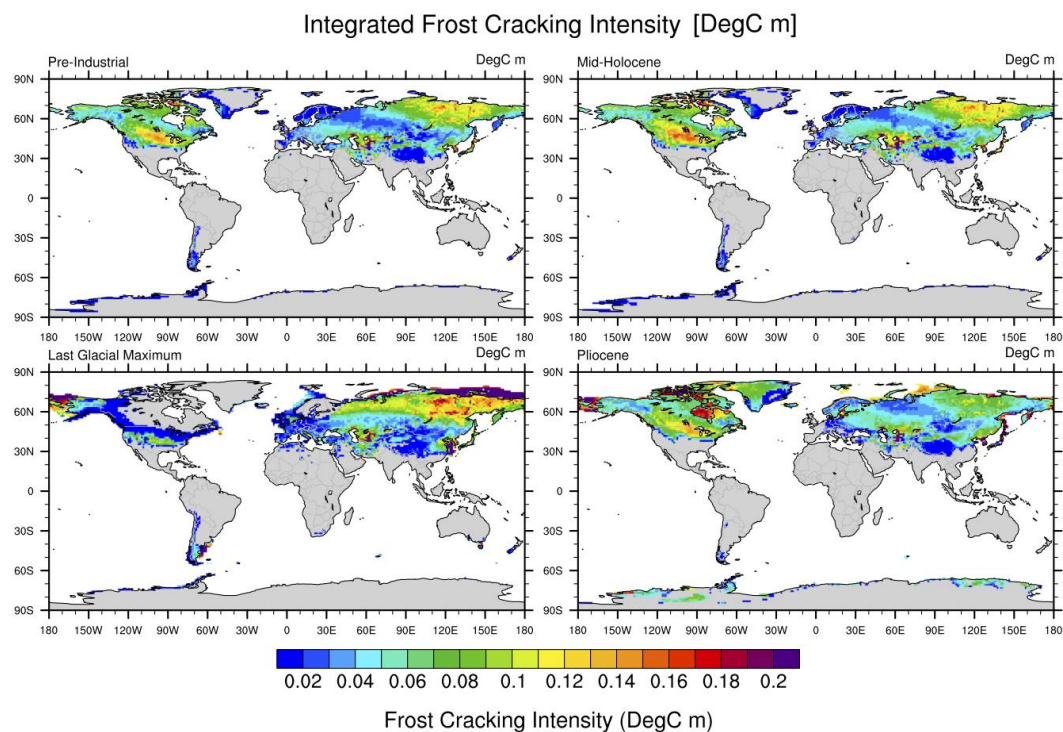

258  
259 **Figure 6.** Model 3 predicted integrated FCI as a function of thermal gradient and sediment thickness for Pre-Industrial (top-left),  
260 Mid-Holocene (top-right), Last Glacial Maximum (bottom-left), and mid-Pliocene (bottom-right) times (unit: °C m). Data plotted in  
261 this figure are available in the supplemental material for readers interested in plotting / using it for other purposes. The grey areas  
262 in plots indicates the absence of frost cracking. For the Last Glacial Maximum time slice and Greenland and Antarctica (all time  
263 slices) the regions covered by ice were removed from the calculation and are also grey.

264 In the mid-Pliocene, the maximum FCI values are predicted in the higher latitudes of Canada and Alaska ( $0.15\text{ }^{\circ}\text{C m} - 0.22\text{ }^{\circ}\text{C}$   
265  $m$ ). Moderately high values are predicted for Greenland ( $0.02\text{ }^{\circ}\text{C m} - 0.12\text{ }^{\circ}\text{C m}$ ) and the northern latitudes of Eurasia ( $0.05$   
266  $^{\circ}\text{C m} - 0.16\text{ }^{\circ}\text{C m}$ ). Overall, the magnitude of mid-Pliocene FCI is lower than that of all other investigated time slices. The  
267 only exception are some high-latitude regions (NE Canada, eastern Antarctica) that exhibit locally higher FCI values in the  
268 mid-Pliocene relative to the PI. Less frost cracking activity is predicted for South America, which is consistent with the results  
269 of Model 1 (Anderson, 1998).

270 For all the time-slices, regions with positive MATs ( $0\text{ }^{\circ}\text{C}$  to  $15\text{ }^{\circ}\text{C}$ ) exhibit higher values of FCI where the sediment cover is  
271 thinner (e.g. Middle East Asia). In contrast, predictions of FCI in regions with negative MATs ( $-5\text{ }^{\circ}\text{C}$  to  $-20\text{ }^{\circ}\text{C}$ ) and high  $T_a$   
272 ( $30\text{ }^{\circ}\text{C}$  to  $40\text{ }^{\circ}\text{C}$ ) tend to be higher where sediment cover is thicker (e.g. North East Eurasia).

## 273 5. Discussion

274 In this section, we synthesize and interpret the results (from Model 3) at both a global and regional scales. For brevity, we limit  
275 our discussion regional variations to include Tibet, Europe and South America. For other regional areas of interest to readers,  
276 the data used in the following figures is available for download (see acknowledgements). Our presentation of selected regional

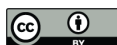

277 areas is followed by the comparison of modeled FCI with published field observations and permafrost extent in the LGM and  
278 present day. We also compare the model outcomes of all the three models used in the study.

### 279 5.1. Synthesis and Interpretation

280 This section comprises the synthesis and interpretation of the trends in FCI values predicted by Model 3 for the investigated  
281 paleoclimate simulations (PI, MH, LGM and PLIO). In the PI and MH simulations, high values of FCI in northern latitudes  
282 ( $60^{\circ}\text{N} - 80^{\circ}\text{N}$ ) in Eurasia and North America coincide with lower MATs in the range of  $-25^{\circ}\text{C}$  to  $-15^{\circ}\text{C}$  and very high  $T_a$ 's  
283 in the range of  $30^{\circ}\text{C}$  to  $40^{\circ}\text{C}$ . Furthermore, the soil thickness in some of these areas is as low as  $10 - 20$  cm in North America,  
284 and  $40 - 50$  cm in Eurasia. The higher values of FCI coincide with positive MATs ( $\sim 10^{\circ}\text{C} - 20^{\circ}\text{C}$ ) in the mid-high latitudes  
285 in North America, where  $T_a$  values are also high ( $25^{\circ}\text{C} - 30^{\circ}\text{C}$ ) and soil cover thickness is in the range of  $50$  cm –  $60$  cm.  
286 However, the highest FCI was predicted in the Middle East, which experiences similar MATs and  $T_a$  values and has  
287 significantly thinner soil cover ( $0$  cm –  $20$  cm). This indicates that frost cracking is more prevalent in areas with positive MATs  
288 and thin or no soil cover. This confirms the findings of (Hales and Roering, 2007, 2009), and Anderson et al. ((2013),  
289 2015)(2015)). FCI in areas with negative MATs and thicker soil cover ( $\sim 80$  cm –  $100$  cm) is mainly controlled by the  $T_a$   
290 values, due to higher  $T_a$  and high thermal gradients predicted in the subsurface, both of which facilitate ice segregation growth  
291 (Hales and Roering, 2007; Hallet et al., 1991; Murton et al., 2006; Walder and Hallet, 1985). A similar effect of temperature  
292 and soil thickness on frost cracking intensity is observed in the LGM and PLIO simulations.

### 293 5.2. Influence of past climate on FCI at a global scale

294 We have investigated the influence of climate change on frost cracking on different spatial scales and through geologic time  
295 using 3 different frost cracking models (Anderson, 1998; Hales and Roering 2007; Andersen et al., 2015) and paleoclimate  
296 GCM simulations (Mutz et al., 2018). Our results for Model 3 are presented as maps showing time-slice specific FCI anomalies  
297 relative to the PI climate simulation on a global scale (Fig. 7), in Tibet (Fig. 8), Europe (Fig. 9) and South America (Fig. 10).  
298 Furthermore, the spatial distribution of FCI in various climates has been compared with the glacier mask (Supplement Fig. 3)  
299 where continental ice was located for all time-slices (PI, MH, LGM and PLIO). This was done to understand the reasons behind  
300 the trend of FCI over time.

301 The differences in FCI between the PI and MH climate simulations are the range of  $-0.04^{\circ}\text{C m}$  to  $0.02^{\circ}\text{C m}$ . The MH  
302 simulation yields s higher FCI values for most regions except for parts of northern Asia, mid-western Europe, mid North  
303 America, Alaska, the Andes Mountains and Tibet. These differences may be attributed to the slight changes in MATs in these  
304 regions.

305 The differences between PI and LGM FCI values are highest in the high latitudes (Fig. 7) in North America ( $\Delta\text{FCI} \approx 0.16^{\circ}\text{C}$   
306  $m$ ) and northern Europe ( $\Delta\text{FCI} \approx 0.04^{\circ}\text{C m}$ ). This is likely due to continental glaciation in these areas (Supplement Fig. 3)  
307 leading to low or no frost cracking during LGM. In the mid-high latitudes ( $\sim 50^{\circ}\text{N}$  to  $70^{\circ}\text{N}$ ) of Northern Asia, LGM FCI  
308 values are higher than in PI FCI values ( $\Delta\text{FCI} \approx -0.06^{\circ}\text{C m}$ ). This can be attributed to an absence of glacial cover and higher  
309  $T_a$  values (Fig. 3) in this region during the LGM. However, the LGM FCI values are higher than in the PI simulation ( $\Delta\text{FCI} \approx$   
310  $0.04^{\circ}\text{C m}$ ) in the mid-high latitudes in Asia ( $30^{\circ}\text{N} - 50^{\circ}\text{N}$ ), which may be attributed to the positive MATs in this area during  
311 the PI simulation.

312

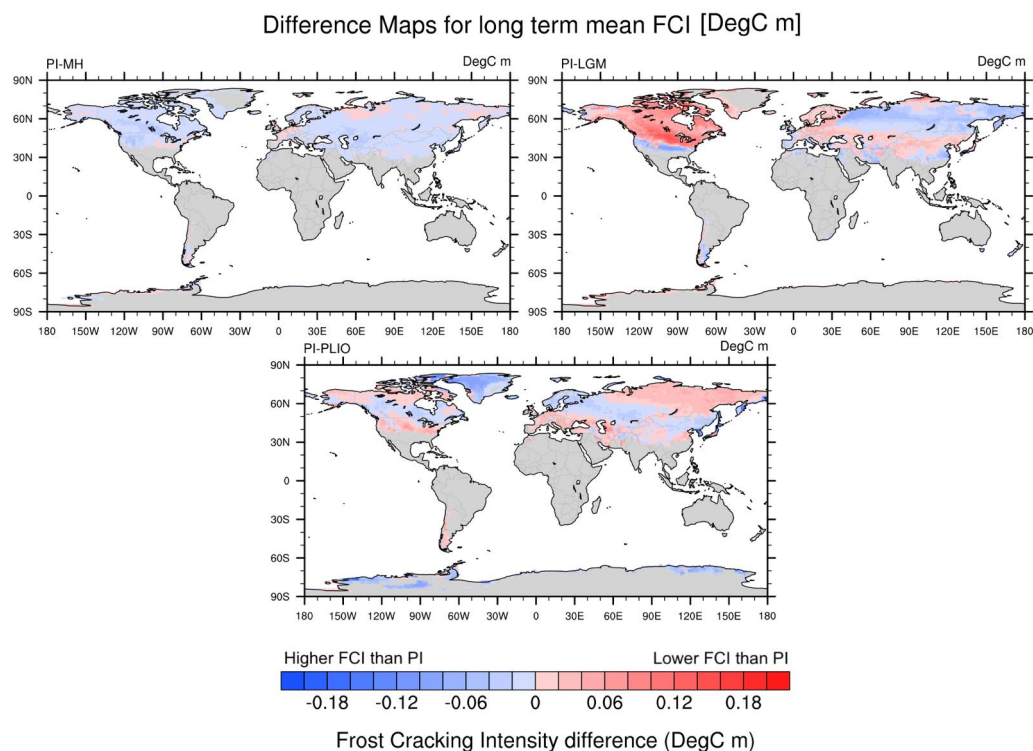

313

314 **Figure 7. Differences in long-term mean FCI (Model 3) between the Pre-Industrial minus (-) the Mid-Holocene (top-left), Pre-**  
315 **Industrial - Last Glacial Maximum (top-right), and Pre-Industrial - mid-Pliocene (bottom) (unit: °C m) at a global scale.**

316 The PLIO FCI (Fig. 7) is lower than PI FCI ( $\Delta\text{FCI} \approx 0.10 \text{ }^\circ\text{C m}$ ) in Antarctica ( $150^\circ\text{W} - 60^\circ\text{W}$ ;  $100^\circ\text{E} - 170^\circ\text{E}$ ), Greenland  
317 and in the higher latitudes of North America ( $70^\circ\text{N} - 80^\circ\text{N}$ ). This may be attributed to the absence of glacial cover in these  
318 areas due to the warmer mid-Pliocene climate. The same differences can be observed in the mid-high latitudes of northern  
319 Europe, North America and Asia ( $40^\circ\text{N} - 60^\circ\text{N}$ ), possibly due to higher MATs in the PLIO simulation. Higher FCI is predicted  
320 during the PI simulation in the higher latitudes in Asia ( $50^\circ\text{N} - 80^\circ\text{N}$ ,  $40^\circ\text{E} - 180^\circ\text{E}$ ), Tibet, Middle East Asia, southern  
321 Europe, parts of North America ( $28^\circ\text{N} - 40^\circ\text{N}$ ;  $60^\circ\text{N} - 70^\circ\text{N}$ ) and South America (the Andes Mountain range), with the FCI  
322 difference ranging from  $0.02 \text{ }^\circ\text{C m} - 0.08 \text{ }^\circ\text{C m}$ . This can be attributed to higher  $T_a$  in the PI simulation relative to the other  
323 time slices.

324 In summary, the overall comparison of differences between paleo-FCI and PI-FCI indicates a low impact of changing surface  
325 temperatures between the PI and MH simulations on frost cracking. This is not surprising given the relatively small  
326 climatological differences between the simulations. The differences in FCI between PLIO and PI are more varied, but generally  
327 greater. More specifically, warmer regional climates in the Pliocene seem to facilitate frost cracking in higher latitudes,  
328 especially in Greenland, when glaciation is absent. The LGM simulation produced the greatest differences in FCI with respect  
329 to the PI simulation. These can be attributed to increased glaciation and a much colder climate in higher latitudes, including  
330 North America and Europe. High LGM-FCI values were exhibited east of the Andes Mountains in the southern part of South  
331 America, possibly due to the absence of glacial cover and high  $T_a$  values ( $\sim 20^\circ\text{C} - 25^\circ\text{C}$ ) (Fig. 3) in the region. The above





332 interpretations are in agreement with Mutz et al. (2018) and Mutz and Ehlers (2019) who suggested minor deviation of MH  
333 MATs from PI values, and high deviations in FCI in the LGM and PLIO simulations.

### 334 5.3. Regional effects of past climates on FCI

#### 335 5.3.1. Tibet

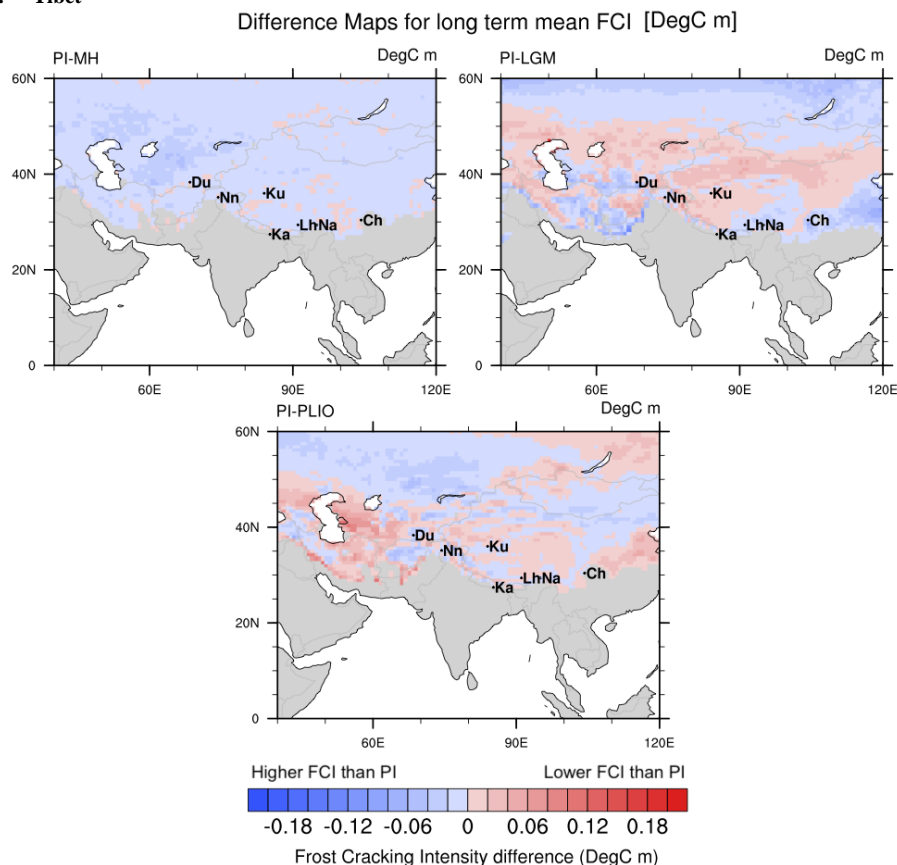

336  
337 **Figure 8.** Differences in long-term mean FCI (Model 3) between the Pre-Industrial minus (-) the Mid-Holocene (top-left), Pre-  
338 Industrial - Last Glacial Maximum (top-right), and Pre-Industrial - mid-Pliocene (bottom) (unit: °C m) in Tibet. City  
339 abbreviations: Du – Dushambe, Nn – Srinagar, Ku – Xinjiang, Ka – Kathmandu, Lh – Lhasa, Na – Namcha Barwa, Ch –  
340 Chenshangou.

341 Tibet exhibits only small ( $\sim 0.02$  °C m), predominantly positive MH-FCI deviations from PI conditions (Fig. 8). The PI – LGM  
342 comparison reveals higher PI FCI values ( $\Delta\text{FCI} \approx 0.06$  °C m) on the Tibetan Plateau. Only the eastern part of Tibet, near Lhasa  
343 city, LGM FCI values are higher ( $\Delta\text{FCI} \approx 0.04$  °C m). In the PI – PLIO comparison, the PI exhibits higher FCI values ( $\Delta\text{FCI}$   
344  $\approx 0.04$  °C m) over most of the Tibetan Plateau, except for the eastern slopes of Himalayas, where PLIO-FCI values are higher  
345 ( $\Delta\text{FCI} \approx 0.04$  °C m). The LGM simulation yields the greatest deviations from PI conditions due to significantly lower  
346 temperature and FCI values in the LGM.

#### 347 5.3.2. Europe

348



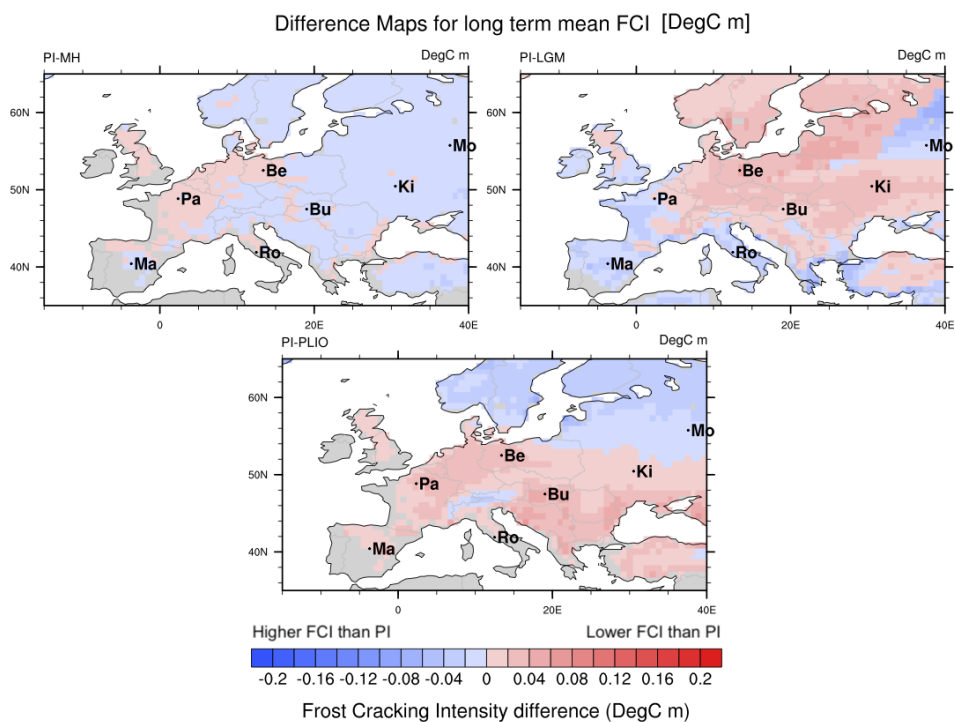

349

350 **Figure 9.** Differences in long-term mean FCI (Model 3) between the Pre-Industrial minus (-) the Mid-Holocene (top-left), Pre-  
 351 Industrial - Last Glacial Maximum (top-right), and Pre-Industrial – the mid-Pliocene (bottom) (unit: °C m) in Europe. City  
 352 abbreviations: Pa – Paris, Be – Berlin, Mo – Moscow, Ki – Kiev, Ro – Rome, Bu – Budapest, Ma – Madrid.

353 As in Tibet, the PI – MH comparisons for Europe (Fig. 9) reveal very small deviations in MH-FCI from PI conditions ( $\Delta FCI$   
 354  $\approx -0.02$  °C m to  $0.02$  °C m). These are negative in Western Europe (including areas near the cities of Paris, Berlin and Rome),  
 355 and positive in Eastern Europe (including Budapest, Kiev and Moscow). In the PI – LGM comparison, the PI shows higher  
 356 FCI ( $\Delta FCI \approx 0.02$  °Cm –  $0.06$  °Cm) in central Europe (including Paris, Berlin, Budapest and Kiev), and lower FCI values  
 357 ( $\Delta FCI \approx -0.02$  °C m -  $-0.06$  °C m) in southern Europe (including Madrid and Rome). In the PI – PLIO comparison, higher PI-  
 358 FCI ( $\Delta FCI \approx 0.02$  °C m -  $0.06$  °C m) is exhibited in central to southern Europe (including Madrid, Paris, Berlin, Rome,  
 359 Budapest and Kiev), and lower PI-FCI prevails in northern Europe ( $\Delta FCI \geq -0.08$  °C m). Similar to Tibet, and likely for the  
 360 same reasons, Europe also shows the highest impact of climate change on frost cracking during the LGM.

361 **5.3.3. South America**

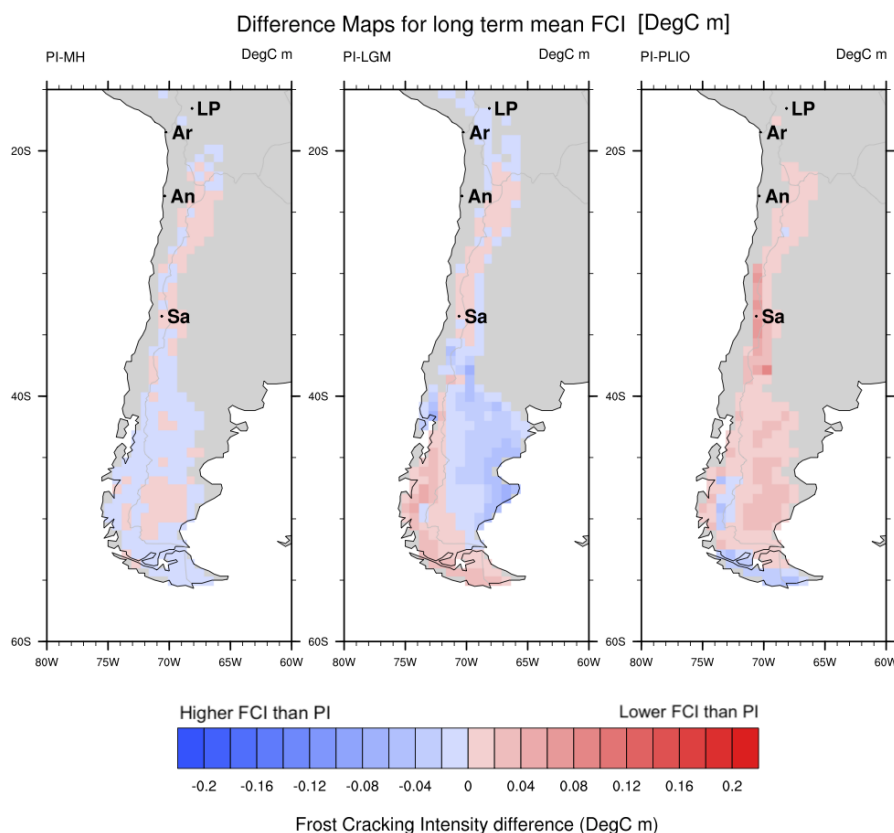

362

363 **Figure 10. Differences in long-term mean FCI (Model 3) between the Pre-Industrial minus (-) the Mid-Holocene (top-left), Pre-**  
364 **Industrial - Last Glacial Maximum (top-right), and Pre-Industrial - mid-Pliocene (bottom) (unit: °C m) in southwestern South**  
365 **America. City abbreviations: LP – La Paz, Ar – Arica, An – Antofagasta, Sa – Santiago.**

366 The magnitude of PI-MH FCI differences in southwestern South America (Fig. 10) are similar to that of other regions ( $\Delta FCI$   
367  $\approx -0.02$  °C m to  $0.02$  °C m). However, in the PI – LGM comparison for this region, the LGM yields lower FCI values ( $\Delta FCI \leq$   
368  $0.06$  °C m) in the Andes Mountains, and the PI simulation yields lower FCI values ( $\Delta FCI \geq -0.06$  °C m) in the east of the Andes  
369 Mountains in the southern part of the region ( $40^{\circ}S - 50^{\circ}S$ ). The PI – PLIO comparison reveals the highest differences in FCI  
370 ( $\Delta FCI \approx 0.02$  °C m to  $0.08$  °C m). In southwestern South America, the biggest differences in frost cracking produced by the  
371 PLIO simulations, followed by the LGM simulations. This is likely caused by the temperatures in the Pliocene, which prevent  
372 the bedrock in mid-latitude South America to reach FCW.

#### 373 **5.4. Comparison to observations**

##### 374 **5.4.1. Comparison to previous related studies**

375 In a previous study by Amitrano et al. (2012), evidence of frost cracking in the Swiss Alps was investigated in high-alpine  
376 rock walls. The maximum values for FCI were observed in the temperature range of  $0$  °C to  $-5$  °C for granite and gneiss  
377 lithologies. The measurement site was a south facing cliff at an elevation of about  $\sim 3500$  m a.s.l. with local mean annual air  
378 temperature of  $-7.3$  °C (1961 - 1990) and mean annual rock temperature of  $-2$  °C to  $3$  °C (Hasler et al., 2011). Amitrano et  
379 al., (2012) suggested that increased frost cracking for warmer periods could be interpreted as an effect of thermal dilation of



380 cracks. This is supported by our study, as in Model 3 results, the northern latitudes in Eurasia and mid latitudes in North  
381 America and Alaska show high values of frost cracking intensity ( $\sim 0.08$  °C m –  $0.18$  °C m) in PI, MH and PLIO simulations.  
382 Another study (Girard et al., 2013) in the Swiss Alps (Jungfrauoch) applied acoustic emission techniques and suggests  
383 increased FCI for subsurface temperatures ranging from  $0$  °C to  $-15$  °C. Furthermore, Girard et al. (2013) suggested that  
384 sustained freezing can yield much stronger frost cracking activity than repeated freeze-thaw cycling. Larger rates of acoustic  
385 energy detected at negative temperatures ( $T < 0$  °C) suggest that water migration and segregation ice growth play an important  
386 role in frost cracking. This supports our Model 3 results for the LGM simulations in northern Eurasia and Alaska, which show  
387 high FCI values in the range of  $\sim 0.12$  °C m –  $0.22$  °C m.  
388 Hales and Roering (2007) suggested that FCI is higher near the surface, up to a penetration depth of 4 m, because the steepest  
389 thermal gradients are near to the surface. In contrast to field studies (Amitrano et al., 2012; Girard et al., 2013), Hales and  
390 Roering (2007) suggested that positive MATs account for higher FCI due to the higher availability of water for segregation  
391 ice growth, which is consistent with this study's high FCI in the mid-high latitudes of North America ( $\sim 40$  °N –  $50$  °N during  
392 PI, MH and PLIO simulations and  $\sim 35$  °N –  $45$  °N during LGM simulation) and mid-latitudes in South America ( $\sim 15$  °S –  
393  $55$  °S during PI, MH and LGM simulations).  
394 Anderson et al. (2013) suggested that FCI is higher for moderately low, negative MATs and that frost cracking in cold regions  
395 could persist due to water transport in cold bedrock. Furthermore, Andersen et al. (2015) suggested that frost cracking can be  
396 active in moderately warm climates provided that sediment cover is very thin ( $< 10$  cm) and the surface temperature is  
397 occasionally lowered into the frost cracking window. The above findings are in agreement with our computed FCI ( $\sim 0.16$  °C  
398 m –  $0.2$  °C m) in the middle east ( $\sim 36$  °N –  $48$  °N and  $54$  °E –  $80$  °E), which has a relatively thin sediment cover ( $> 5$  cm) and  
399 MAT range of  $5$  °C to  $15$  °C. Finally, recent work (Marshall et al., 2015, 2017) for Western Oregon, USA, suggested that  
400 periglacial processes were vigorous during the LGM, which is supported by our model showing maximum FCI values ( $0.12$   
401 °C m to  $0.22$  °C m) in higher latitudes in Asia ( $\sim 70$  °N –  $80$  °N) and Alaska ( $\sim 60$  °N –  $75$  °N) during LGM. Taken together,  
402 the previous regional studies are consistent with the direction of change in the FCI predicted by our global analysis.

#### 403 5.4.2. Comparison of results to permafrost extent

404

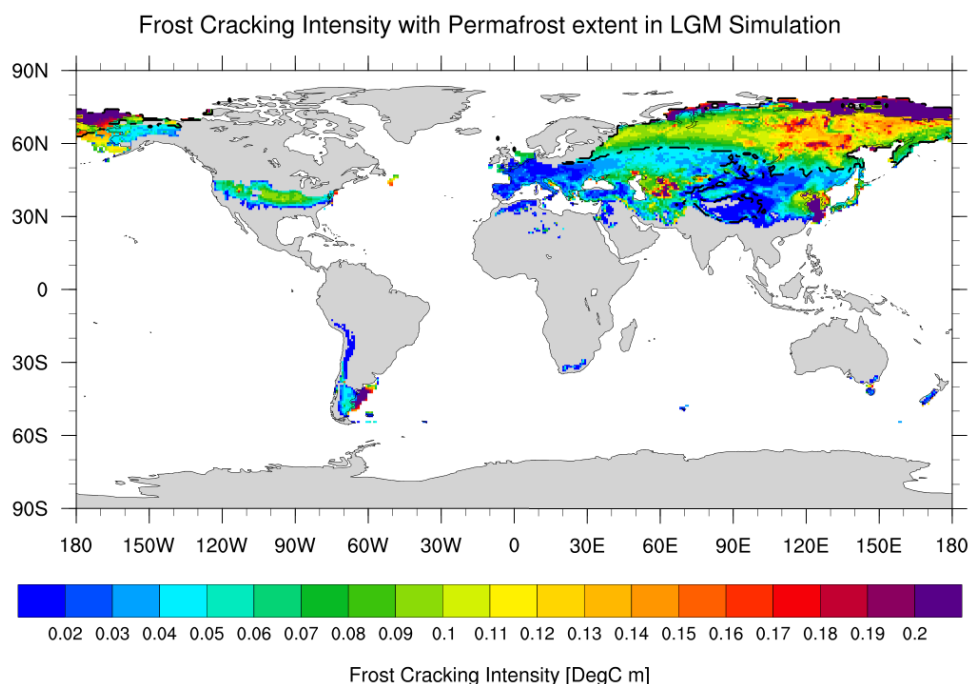

405

406 **Figure 11. Frost cracking intensity (Model 3) and continuous permafrost extent in the LGM (depicted by black dashed lines).**

407 High LGM-FCI values ( $> \sim 0.06$ ) correlate with permafrost extent in higher latitudes in Eurasia, Alaska and Tibet and  
408 Himalayan regions (Fig. 11). Similarly, a good correlation for FCI  $> \sim 0.06$  in the PI simulation and permafrost in the PD  
409 simulation is observed for higher latitudes in Asia and North America (Fig 12). However, permafrost extent does not cover  
410 Montane and Alpine permafrost in North America near the southern extent of the ice sheet ( $35^{\circ}\text{N}$  to  $45^{\circ}\text{N}$  latitudes) in the  
411 LGM simulation, as suggested by French and Millar (2014), where FCI exhibits a sudden increase ( approx.  $0.08^{\circ}\text{C m}$  to  $0.1$   
412  $^{\circ}\text{C m}$ ). Overall, FCI and permafrost extent correlate reasonably well with our predictions.

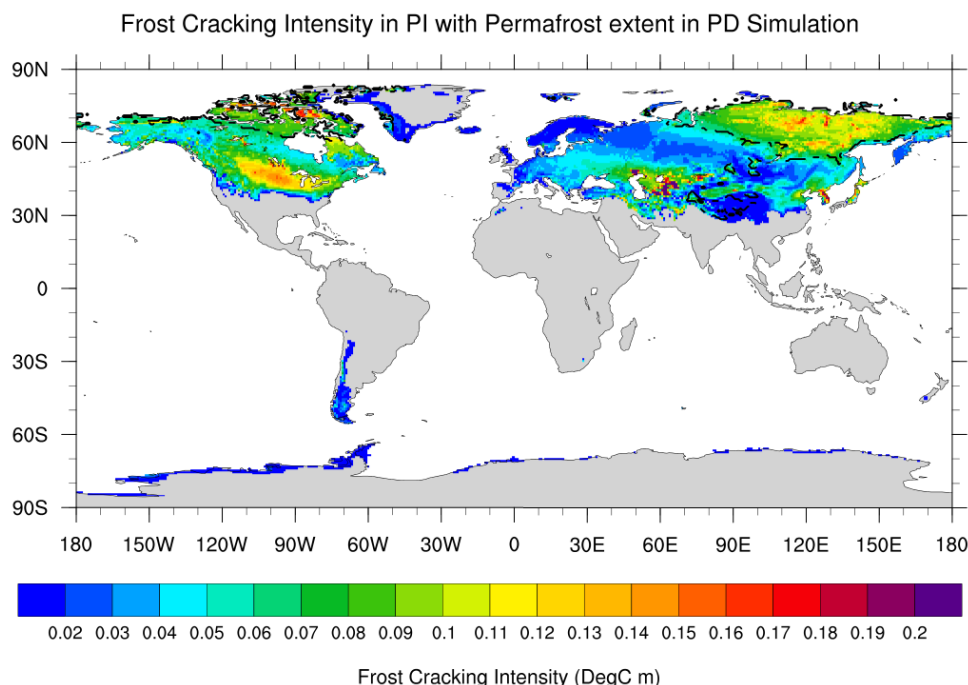

413

414 **Figure 12.** Frost cracking intensity in the Pre-Industrial simulation (Model 3) and continuous permafrost extent in Present-Day  
415 (depicted by black dotted line).

### 416 5.5. Inter-comparison of Models 1-3

417 A comparison of the FCI predicted by the three models for the different time slices highlights some key differences (Fig. 6,  
418 and supplement Figs 1, 2). The spatial extent of frost cracking in specific time-slices is different in all the three models, which  
419 can be accredited to different inputs considered in each model, namely the availability of water for frost cracking by segregation  
420 ice growth. For example, the glaciated region (Supplement Fig. 3) in North America and Greenland exhibits the occurrence of  
421 frost cracking in Model 1, significantly reduced frost cracking in Model 2, and the complete absence of frost cracking in Model  
422 3.

423 Model 1 predicts the maximum FCI values in the regions with MATs in the range of  $-10\text{ }^{\circ}\text{C}$  to  $-5\text{ }^{\circ}\text{C}$ , relatively low FCI values  
424 in regions with MATs of  $-5\text{ }^{\circ}\text{C}$  to  $0\text{ }^{\circ}\text{C}$ , and very low values in regions characterized by high MATs above  $0\text{ }^{\circ}\text{C}$ . In contrast,  
425 Model 2 (Supplement Fig. 2) and Model 3 yield maximum FCI values for positive MATs with high  $T_a$ , as observed in previous  
426 studies (Andersen et al., 2015; Anderson et al., 2013; Hales and Roering, 2007; Marshall et al., 2015). In Model 3, the soil  
427 thickness plays an important role in the estimation of the FCI. The model produces high FCI values for areas with low soil  
428 thickness, such as  $< 5\text{ cm}$  in Eurasia ( $55\text{ }^{\circ}\text{E}$  –  $80\text{ }^{\circ}\text{E}$ ,  $35\text{ }^{\circ}\text{N}$  –  $50\text{ }^{\circ}\text{N}$ ) and  $10\text{ cm}$  to  $20\text{ cm}$  for North America ( $50\text{ }^{\circ}\text{N}$  –  $63\text{ }^{\circ}\text{N}$ ;  
429  $70\text{ }^{\circ}\text{N}$  –  $80\text{ }^{\circ}\text{N}$ ). This result is in close agreement with Andersen et al. (2015). Due to the lower penetration depths of the  
430 freezing front, the FCI is considerably dampened in the presence of the soil cover, thereby limiting the bedrock from reaching  
431 FCW in cases of positive MATs (Andersen et al., 2015).

432 The spatial pattern of frost cracking in Model 3 is influenced by consideration of segregation ice growth, in which the available  
433 volume of water ( $V_w$ ) in the vicinity of an ice lens is critical. Segregation ice growth and sediment cover are responsible for



434 the observed patterns in FCI. The other models considered (see supplement Fig. 1, 2) do not explicitly account for both these  
435 processes and therefore produce different predictions of the FCI in some regions.

436

#### 437 **5.6. Model Limitations**

438 Here we discuss the limitations of the 3 frost cracking models and uncertainties stemming from the application of the ECHAM5  
439 simulations as input to these models. One of the most important limitations is the use of the same soil thickness for each of  
440 our paleoclimate time-slices (Wieder, 2014). In reality, the soil thickness may be different for PI, MH, LGM, and PLIO due  
441 to erosion and sedimentation. However, there are currently no other global estimates of paleo soil thickness available.  
442 Therefore, using present-day thickness remains the best-informed and feasible approach. Furthermore, uniform thermal  
443 diffusivity and porosity were used for bedrock and sediment cover over the globe for simplification, even though thermal  
444 diffusivity and porosity vary for different Earth materials. The application of different thermal diffusivities for individual  
445 lithologies was not considered, although typical thermoconductivity variations of rocks can vary by a factor of 2-3 at the most  
446 (Ehlers, 2005). In addition, our models neglect the hydrogeological properties of bedrock, including moisture content and  
447 permeability for calculation of subsurface temperature variations, which may influence water availability for frost cracking.  
448 To the best of our knowledge, there are no global inventories of these properties that are suited for studies such as ours. In our  
449 approach, we **assume that these material properties are spatially and temporally constant**. As a result, our predictions are only  
450 suited as adequate representations of greater regional trends in FCI, and the reader is advised that local deviations from our  
451 values are likely and depend on near surface geologic and hydrologic variations. A further source of uncertainties stems from  
452 possible inaccuracies in paleoclimate estimates that drive the frost cracking models. The reader is referred to Mutz et al. (2018)  
453 for further discussion of the GCM's limitations. Given the above limitations, we cautiously highlight that the results presented  
454 here are essentially maps of FCI sensitivity to climate change forcing. Although broad agreement is found between our  
455 predictions and previous work (Section 5.5), we caution that geologic and hydrologic complexities in the 'real world' may  
456 produce variations in FCI driven by hydrologic and geologic heterogeneities we are unable to account for.

457 Finally, it is worth noting that only selected time slices were evaluated here. Although the LGM was a significant global glacial  
458 event, previous (and more extreme) ice ages occurred in the Quaternary. Therefore, the spatial patterns of FCI predicted here  
459 may not match observations in all areas, particularly where they have a 'periglacial hangover' of frost cracking from previous  
460 glaciations.

#### 461 **6. Conclusions**

462 We presented three approaches to quantify the frost cracking intensity (FCI) for different times in the Late Cenozoic, namely  
463 pre-industrial (PI, ~1850 CE), Mid-Holocene (MH, ~6 ka), Las Glacial Maximum (LGM, ~21 ka) and mid-Pliocene (PLIO,  
464 ~3 Ma). These approaches are based on process-informed frost cracking models and their coupling to paleoclimate simulations  
465 (Mutz et al., 2018). A simple one-dimensional heat conduction model (Hales and Roering, 2007) was applied along with FCI  
466 estimation approaches from Anderson (1998) and Anderson et al. ((2013)(1998)). Our analysis and presentation of results  
467 focused on the most recent and more thoroughly parameterized approach of Andersen et al., (2015; Model 3). Specifically, we  
468 quantified the change in direction and magnitude of FCI in the above-mentioned climate states with respect to the PI control  
469 simulation. The major findings of our study include:

- 470 1. The latitudinal extent of frost cracking in the PI and MH are very similar, in Eurasia (28 °N – 80 °N), North America  
471 (40 °N – 80 °N) and South America (20 °S – 55 °S). During the LGM, the FCI extent is reduced in Eurasia (28 °N –  
472 78 °N) and North America (35 °N – 75 °N), and increased in South America (15 °S – 55 °S). This can be attributed



473 to extensive glaciation in the northern parts of Canada, Greenland and Northern Europe not favoring the frost cracking  
474 process. In the PLIO, the FCI extent is similar to that of PI in Eurasia (30 °N – 80 °N) and North America (40 °N –  
475 85 °N). PLIO-FCI values are higher in Canada (~ 0.16 °C m to 0.18 °C m) and Greenland (~ 0.08 °C m), but  
476 significantly reduced in South America (21 °S – 55 °S) with values of FCI below 0.02 °C m.

477 2. MH climatic conditions induce only small deviations of FCI from PI values, whereas the colder (LGM) and warmer  
478 (PLIO) climates produce larger FCI anomalies, which are consistent with the findings of Mutz and Ehlers, 2019.

479 3. Higher frost cracking intensities in the PI simulation spatially correlate with the occurrence of continuous permafrost  
480 in the PD at higher latitudes in Eurasia and North America. On the other hand, during the LGM, high frost cracking  
481 in Alaska and northern latitudes of Eurasia show a good correlation with continuous predicted permafrost of the same  
482 time.

483 The predicted changes in FCI presented here do not entirely confirm our hypothesis that: Late Cenozoic global climate change  
484 resulted in varying intensity in FCI such that more intense frost cracking at lower latitudes during colder climates. Of particular  
485 interest is that although we document latitudinally influenced spatial and temporal changes in FCI, these changes are not  
486 uniform at the same latitude. The largest changes in FCI between time slices occur in different geographic regions at different  
487 time periods meaning that a more simplified approach of assuming only latitudinal shifts in FCI between cold and warm  
488 periods is not sufficient and that spatial changes in global climate need to be taken into account.

489 Finally, we suggest that Model 3 can be adapted in future work to regional conditions, using field geological and  
490 hydrogeological parameters for better accuracy (Andersen et al., 2015). The results of this study can further be used in  
491 modelling the erosion and denudation processes related to frost cracking. Predictions for potential future sites that are prone  
492 to hazards related to frost cracking, such as rockfall, can be generated by coupling these models to climate simulations forced  
493 with different greenhouse gas concentration scenarios representing different possible climate conditions of the future.

#### 494 **Code availability**

495 The code and data used in this study are freely available upon request.

#### 496 **Author contributions**

497 HS, SM and TAE designed the initial model setup and simulation programs and conducted model modifications, simulation  
498 runs and analysis. HS and TAE prepared the manuscript with contributions from SM.

#### 499 **Competing interests**

500 The authors declare that they have no competing interests.

#### 501 **Acknowledgements:**

502 H.S, S.G.M. and T.A.E. acknowledge support by Open Access Publishing Fund of University of Tübingen. We thank XX and  
503 YY for constructive reviews. The primary model results from this study (Model 3) are available in the supplemental material  
504 for plotting / use by interested readers. The climate model results used in this study are available via information provided in  
505 Mutz et al., (2018). H.S and T.A.E. acknowledge support from the Research Training Group 1829 Integrated Hydrosystem  
506 Modelling, funded by the German Research Foundation (DFG). In addition, T.A.E. acknowledges support from the German



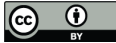

507 priority research program *EarthShape: Earth Surface Shaping by Biota* (SPP-1803; grant EH329/14-2), and support from the  
508 California Institute of Technology Moore Distinguished Scholar program.

## 509 **References**

510 Abe-Ouchi, A., Saito, F., Kageyama, M., Braconnot, P., Harrison, S.P., Lambeck, K., Otto-Bliesner, B. L., Peltier, W. R.,  
511 Tarasov, L., Peterschmitt, J.-Y., and Takahashi, K.: Ice-sheet configuration in the CMIP5/PMIP3 Last Glacial Maximum  
512 experiments, *Geosci. Model Dev.*, 8, 3621–3637, <https://doi.org/10.5194/gmd-8-3621-2015>, 2015.

513 Acosta, V. T., Schildgen, T. F., Clarke, B. A., Scherler, D., Bookhagen, B., Wittmann, H., von Blanckenburg, F., and Strecker,  
514 M. R.: Effect of vegetation cover on millennial-scale landscape denudation rates in East Africa, 7, 408–420,  
515 <https://doi.org/10.1130/L402.1>, 2015.

516 Adams, B. A., Whipple, K. X., Forte, A. M., Heimsath, A. M., and Hodges, K. V.: Climate controls on erosion in tectonically  
517 active landscapes, 6, eaaz3166, <https://doi.org/10.1126/sciadv.aaz3166>, 2020.

518 Amitrano, D., Gruber, S., and Girard, L.: Evidence of frost-cracking inferred from acoustic emissions in a high-alpine rock-  
519 wall, *Earth and Planetary Science Letters*, 341–344, 86–93, <https://doi.org/10.1016/j.epsl.2012.06.014>, 2012.

520 Andersen, J. L., Egholm, D. L., Knudsen, M. F., Jansen, J. D., and Nielsen, S. B.: The periglacial engine of mountain erosion  
521 - Part 1: Rates of frost cracking and frost creep, *Earth Surf. Dynam.*, 3, 447–462, <https://doi.org/10.5194/esurf-3-447-2015>,  
522 2015.

523 Anderson, R. S.: Near-surface Thermal Profiles in Alpine Bedrock: Implications for the Frost Weathering of Rock, *Arctic and*  
524 *Alpine Research*, 30, 362–372, <https://doi.org/10.1080/00040851.1998.12002911>, 1998.

525 Anderson, R. S., Anderson, S. P., and Tucker, G. E.: Rock damage and regolith transport by frost: an example of climate  
526 modulation of the geomorphology of the critical zone: ROCK DAMAGE AND REGOLITH TRANSPORT BY FROST, *Earth*  
527 *Surf. Process. Landforms*, 38, 299–316, <https://doi.org/10.1002/esp.3330>, 2013.

528 Botsyun, S., Ehlers, T. A., Mutz, S. G., Methner, K., Krsnik, E., and Mulch, A.: Opportunities and Challenges for  
529 Paleointensity in “Small” Orogens: Insights From the European Alps, *Geophysical Research Letters*, 47, e2019GL086046,  
530 <https://doi.org/10.1029/2019GL086046>, 2020.

531 Davidson, G. P. and Nye, J. F.: A photoelastic study of ice pressure in rock cracks, *Cold Regions Science and Technology*, 11,  
532 141–153, [https://doi.org/10.1016/0165-232X\(85\)90013-8](https://doi.org/10.1016/0165-232X(85)90013-8), 1985.

533 Delunel, R., van der Beek, P. A., Carcaillet, J., Bourlès, D. L., and Valla, P. G.: Frost-cracking control on catchment denudation  
534 rates: Insights from in situ produced  $^{10}\text{Be}$  concentrations in stream sediments (Ecrins–Pelvoux massif, French Western Alps),  
535 *Earth and Planetary Science Letters*, 293, 72–83, <https://doi.org/10.1016/j.epsl.2010.02.020>, 2010.

536 Egholm, D. L., Andersen, J. L., Knudsen, M. F., Jansen, J. D., and Nielsen, S. B.: The periglacial engine of mountain erosion  
537 - Part 2: Modelling large-scale landscape evolution, *Earth Surf. Dynam.*, 3, 463–482, [https://doi.org/10.5194/esurf-3-463-](https://doi.org/10.5194/esurf-3-463-2015)  
538 2015, 2015.

539 Ehlers, T. A. and Poulsen, C. J.: Influence of Andean uplift on climate and paleointensity estimates, *Earth and Planetary*  
540 *Science Letters*, 281, 238–248, <https://doi.org/10.1016/j.epsl.2009.02.026>, 2009.

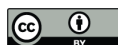

- 541 Eppelbaum, T. A., Kutasov, I., and Pilchin, A.: Thermal Properties of Rocks and Density of Fluids, in: Applied Geothermics,  
542 Springer-Verlag Berlin Heidelberg, 99–149, 2014.
- 543 French, H. M. and Millar, S. W. S.: Permafrost at the time of the Last Glacial Maximum (LGM) in North America, Boreas,  
544 43, 667–677, <https://doi.org/10.1111/bor.12036>, 2014.
- 545 Girard, L., Gruber, S., Weber, S., and Beutel, J.: Environmental controls of frost cracking revealed through in situ acoustic  
546 emission measurements in steep bedrock: IN SITU MEASUREMENTS OF FROST CRACKING, *Geophys. Res. Lett.*, 40,  
547 1748–1753, <https://doi.org/10.1002/grl.50384>, 2013.
- 548 Hales, T. C. and Roering, J. J.: Climatic controls on frost cracking and implications for the evolution of bedrock landscapes,  
549 *J. Geophys. Res.*, 112, F02033, <https://doi.org/10.1029/2006JF000616>, 2007.
- 550 Hales, T. C. and Roering, J. J.: A frost “buzzsaw” mechanism for erosion of the eastern Southern Alps, New Zealand,  
551 *Geomorphology*, 107, 241–253, <https://doi.org/10.1016/j.geomorph.2008.12.012>, 2009.
- 552 Hallet, B., Walder, J. S., and Stubbs, C. W.: Weathering by segregation ice growth in microcracks at sustained subzero  
553 temperatures: Verification from an experimental study using acoustic emissions, *Permafrost Periglac. Process.*, 2, 283–300,  
554 <https://doi.org/10.1002/ppp.3430020404>, 1991.
- 555 Hasler, A., Gruber, S., and Haeberli, W.: Temperature variability and offset in steep alpine rock and ice faces, *The Cryosphere*,  
556 5, 977–988, <https://doi.org/10.5194/tc-5-977-2011>, 2011.
- 557 Herman, F. and Champagnac, J.-D.: Plio-Pleistocene increase of erosion rates in mountain belts in response to climate change,  
558 *Terra Nova*, 28, 2–10, <https://doi.org/10.1111/ter.12186>, 2016.
- 559 Kellerer-Pirklbauer, A.: Potential weathering by freeze-thaw action in alpine rocks in the European Alps during a nine year  
560 monitoring period, *Geomorphology*, 296, 113–131, <https://doi.org/10.1016/j.geomorph.2017.08.020>, 2017.
- 561 Levavasseur, G., Vrac, M., Roche, D. M., Paillard, D., Martin, A., and Vandenberghe, J.: Present and LGM permafrost from  
562 climate simulations: contribution of statistical downscaling, *Clim. Past*, 7, 1225–1246, [https://doi.org/10.5194/cp-7-1225-](https://doi.org/10.5194/cp-7-1225-2011)  
563 2011, 2011.
- 564 Marshall, J. A., Roering, J. J., Bartlein, P. J., Gavin, D. G., Granger, D. E., Rempel, A. W., Praskievicz, S. J., and Hales, T.  
565 C.: Frost for the trees: Did climate increase erosion in unglaciated landscapes during the late Pleistocene?, *Sci. Adv.*, 1,  
566 e1500715, <https://doi.org/10.1126/sciadv.1500715>, 2015.
- 567 Marshall, J. A., Roering, J. J., Gavin, D. G., and Granger, D. E.: Late Quaternary climatic controls on erosion rates and  
568 geomorphic processes in western Oregon, USA, *Geological Society of America Bulletin*, 129, 715–731,  
569 <https://doi.org/10.1130/B31509.1>, 2017.
- 570 Matsuoka, N.: Direct observation of frost wedging in alpine bedrock, *Earth Surf. Process. Landforms*, 26, 601–614,  
571 <https://doi.org/10.1002/esp.208>, 2001.
- 572 Matsuoka, N.: Frost weathering and rockwall erosion in the southeastern Swiss Alps: Long-term (1994–2006) observations,  
573 *Geomorphology*, 99, 353–368, <https://doi.org/10.1016/j.geomorph.2007.11.013>, 2008.



- 574 Messenzehl, K., Meyer, H., Otto, J.-C., Hoffmann, T., and Dikau, R.: Regional-scale controls on the spatial activity of rockfalls  
575 (Turtmann Valley, Swiss Alps) — A multivariate modeling approach, *Geomorphology*, 287, 29–45,  
576 <https://doi.org/10.1016/j.geomorph.2016.01.008>, 2017.
- 577 Murton, J. B., Peterson, R., and Ozouf, J.-C.: Bedrock Fracture by Ice Segregation in Cold Regions, *Science*, 314, 1127–1129,  
578 <https://doi.org/10.1126/science.1132127>, 2006.
- 579 Mutz, S. G. and Ehlers, T. A.: Detection and explanation of spatiotemporal patterns in Late Cenozoic palaeoclimate change  
580 relevant to Earth surface processes, *Earth Surf. Dynam.*, 7, 663–679, <https://doi.org/10.5194/esurf-7-663-2019>, 2019.
- 581 Mutz, S. G., Ehlers, T. A., Werner, M., Lohmann, G., Stepanek, C., and Li, J.: Where is Late Cenozoic climate change most  
582 likely to impact denudation?, *Cross-cutting themes: Impacts of climate change on Earth surface dynamics*,  
583 <https://doi.org/10.5194/esurf-2017-47>, 2018.
- 584 Peizhen, Z., Molnar, P., and Downs, W. R.: Increased sedimentation rates and grain sizes 2±4 Myr ago due to the influence of  
585 climate change on erosion rates, *410*, 7, 2001.
- 586 Rangwala, I. and Miller, J. R.: Climate change in mountains: a review of elevation-dependent warming and its possible causes,  
587 *Climatic Change*, 114, 527–547, <https://doi.org/10.1007/s10584-012-0419-3>, 2012.
- 588 Raymo, M. E. and Ruddiman, W. F.: Tectonic forcing of late Cenozoic climate, *Nature*, 359, 117–122,  
589 <https://doi.org/10.1038/359117a0>, 1992.
- 590 Rempel, A. W., Marshall, J. A., and Roering, J. J.: Modeling relative frost weathering rates at geomorphic scales, *Earth and*  
591 *Planetary Science Letters*, 453, 87–95, <https://doi.org/10.1016/j.epsl.2016.08.019>, 2016.
- 592 Renssen, H. and Vandenberghe, J.: Investigation of the relationship between permafrost distribution in NW Europe and  
593 extensive winter sea-ice cover in the North Atlantic Ocean during the cold phases of the Last Glaciation, *Quaternary Science*  
594 *Reviews*, 22, 209–223, [https://doi.org/10.1016/S0277-3791\(02\)00190-7](https://doi.org/10.1016/S0277-3791(02)00190-7), 2003.
- 595 Rode, M., Schnepfleitner, H., and Sass, O.: Simulation of moisture content in alpine rockwalls during freeze-thaw events:  
596 Simulation of Moisture Content in Alpine Rock Walls, *Earth Surf. Process. Landforms*, 41, 1937–1950,  
597 <https://doi.org/10.1002/esp.3961>, 2016.
- 598 Roeckner, E., Bäuml, G., Bonaventura, L., Brokopf, R., Esch, M., Giorgetta, M., Hagemann, S., Kirchner, I., Kornblüeh, L.,  
599 Manzini, E., Rhodin, A., Schlese, U., Schulzweida, U., and Tompkins, A.: The atmospheric general circulation model ECHAM  
600 5. PART I: Model description, Max Planck Institute for Meteorology, Hamburg, Germany, 2003.
- 601 Savi, S., Delunel, R., and Schlunegger, F.: Efficiency of frost-cracking processes through space and time: An example from  
602 the eastern Italian Alps, *Geomorphology*, 232, 248–260, <https://doi.org/10.1016/j.geomorph.2015.01.009>, 2015.
- 603 Simmons, A. J., Burridge, D. M., Jarraud, M., Girard, C., and Wergen, W.: The ECMWF medium-range prediction models  
604 development of the numerical formulations and the impact of increased resolution, *Meteorol. Atmos. Phys.*, 40, 28–60,  
605 <https://doi.org/10.1007/BF01027467>, 1989.
- 606 Turcotte, D. and Schubert, G.: *Geodynamics*, 3rd ed., Cambridge University Press,  
607 <https://doi.org/10.1017/CBO9780511843877>, 2014.

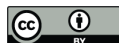

- 608 Walder, J. S. and Hallet, B.: A theoretical model of the fracture of rock during freezing, *GSA Bulletin*, 96, 336–346,  
609 [https://doi.org/10.1130/0016-7606\(1985\)96<336:ATMOTF>2.0.CO;2](https://doi.org/10.1130/0016-7606(1985)96<336:ATMOTF>2.0.CO;2), 1985.
- 610 Wieder, W.: RegridDED Harmonized World Soil Database v1.2, <https://doi.org/10.3334/ornlDaac/1247>, 2014.
- 611 Wei, W. and Lohmann, G.: Simulated Atlantic Multidecadal Oscillation during the Holocene, *J. Climate*, 25(20), 6989–7002,  
612 [doi:10.1175/JCLI-D-11-00667.1](https://doi.org/10.1175/JCLI-D-11-00667.1), 2012.
- 613 Werner, C., Schmid, M., Ehlers, T. A., Fuentes-Espoz, J. P., Steinkamp, J., Forrest, M., Liakka, J., Maldonado, A., and Hickler,  
614 T.: Effect of changing vegetation and precipitation on denudation – Part 1: Predicted vegetation composition and cover over  
615 the last 21 thousand years along the Coastal Cordillera of Chile, 6, 829–858, <https://doi.org/10.5194/esurf-6-829-2018>, 2018.
- 616 Whipple, K. X.: The influence of climate on the tectonic evolution of mountain belts, *Nature Geosci.*, 2, 97–104,  
617 <https://doi.org/10.1038/ngeo0209>, 2009.
- 618 Wieder, W.: RegridDED Harmonized World Soil Database v1.2, <https://doi.org/10.3334/ornlDaac/1247>, 2014.
